1 Using large soybean historical data to study genotype  
2 by environment variation and identify  
3 mega-environments with the integration of genetic and  
4 non-genetic factors

5 Matheus D Krause<sup>1</sup>, Kaio O G Dias<sup>2</sup>, Asheesh K Singh<sup>1</sup>, and William D Beavis<sup>1,\*</sup>

6 <sup>1</sup>*Department of Agronomy, Iowa State University, Ames, IA 50011, USA*

7 <sup>2</sup>*Department of General Biology, Federal University of Viçosa, Viçosa, Brazil*

8 <sup>\*</sup>*Corresponding author: wdbeavis@iastate.edu*

9 Wednesday 11<sup>th</sup> May, 2022

## 10 **1 Highlights**

- 11 • A target population of environments can be split into mega-environments (MEs) according  
12 to phenotypic, geographic, and meteorological information.
- 13 • Reliable estimates of variance components are key to the identification of ME, which can  
14 be obtained by analyses of historical experimental data.
- 15 • From experimental soybean seed yields evaluated across 31 years of field trials, the pheno-  
16 typic variance was mostly attributed to location and location by year effects. In terms of  
17 genotype-by-environment interactions (GEI), estimated variances of genotype by location  
18 interactions was more important than the genotype by year interactions.
- 19 • The GEI trend was successfully captured in terms of parametric probability distributions  
20 of variance components, that can be incorporated in simulation studies.

## 21 **2 Abstract**

22 Soybean (*Glycine max* (L.) Merr.) provides plant based protein for global food production and  
23 is extensively bred to create cultivars with greater productivity in distinct environments. Plant  
24 breeders evaluate new soybean genotypes using multi-environment trials (METs). Application  
25 of METs assume that trial sites provide representative environmental conditions that cultivars  
26 are likely to encounter when sold to farmers. Thus, it is important to understand the patterns  
27 of genotype by environment interactions (GEI) that occur in METs. In order to evaluate GEI for  
28 soybean seed yield and identify mega-environments, historical data were investigated with a ret-  
29 rospective analysis of 39,006 unique experimental soybean genotypes evaluated in preliminary  
30 and uniform trials conducted by public plant breeders from 1989-2019. Mega-environments (MEs)  
31 were identified using yield records of lines from the annual trials and geographic, soil, and mete-  
32 orological records at the trial locations. Results indicate that yield variation was mostly explained  
33 by location and location by year interactions. The static portion of the GEI represented 26.30%  
34 of the total yield variance. Estimates of variance due to genotype by location were greater than  
35 estimates of variance due to genotype by year interaction effects. A trend analysis further indi-  
36 cated a two-fold increase in the genotypic variance. Furthermore, the heterogeneous estimates  
37 of genotypic, genotype by location, genotype by year, and genotype by location by year vari-  
38 ances, were encapsulated by distinct probability distributions. The observed target population of  
39 environments (TPE) can be divided into at least two and at most three MEs, thereby suggesting  
40 improvements in the response to selection can be achieved when selecting directly for clustered  
41 (i.e. regions, ME) versus selecting across regions. Clusters obtained using phenotypic data, lati-  
42 tude, and soil variables plus elevation, were the most effective.

## 43 **3 Keywords**

44 Soybean; Genotype by Environment Interaction; Multi-environmental trials; Target Population  
45 of Environments; Mega-environments

## 46 **4 Introduction**

47 The terms genotype (G) and phenotype (P) were first coined by JOHANNSEN (1911) after the redis-  
48 covery of Mendel’s work. Since then, the understanding of the mapping function that links G to  
49 P has been an on-going research interest (PIGLIUCCI 2001, p. 2). The mapping of G to P for most  
50 quantitatively expressed traits is further complicated by the differential response of genotype(s)  
51 to different environments, i.e. genotype by environment interactions (GEI), wherein phenotypic  
52 variation is shaped by G, Environment (E), and GEI (TABERY 2008; SPRAGUE and FEDERER 1951).  
53 The GEI typically increases P variance and leads to a reduced estimates of heritability, complicat-  
54 ing breeding decisions and lowering response to selection. Additionally, it leads to unpredictable  
55 adaptation of genotypic lines in targeted agro-ecological zones (MACKAY *ET AL.* 2019) and influ-  
56 ences plasticity response of varieties in variable environments (COOPER and DELACY 1994; HAL-  
57 DANE 1947). Hence, the GEI is of particular importance to breeders as they attempt to develop  
58 stable and responsive varieties (COMSTOCK, R. E. and MOLL 1962).

59 In order to reveal GEI patterns, plant breeders evaluate candidate genotypes in multi-environment  
60 trials (METs) (OAKEY *ET AL.* 2016; SMITH *ET AL.* 2001b). Sampled locations used in METs are as-  
61 sumed to represent the growing conditions that a candidate line is expected to encounter as a  
62 cultivar grown by farmers (BUSTOS-KORTS *ET AL.* 2021). METs utilize locations that are sampled  
63 from a target population of environments (TPEs) which represent farm production environments.  
64 Hence, a TPE is composed of many environments (spatially across agro-ecological zones, and tem-  
65 porally over years) (CRESPO-HERRERA *ET AL.* 2021). The manifestation of GEI in a TPE has two  
66 components, the “static” environmental characteristics such as soil, longitude, latitude, and “non-  
67 static” seasonal characteristics such as weather and management practices (CULLIS *ET AL.* 2000).  
68 If GEI is large and associated with consistent sub-groupings of environments within the TPE,  
69 greater gains from selection might be achieved by subdividing locations into Mega-Environments  
70 (MEs) (CRESPO-HERRERA *ET AL.* 2021; YAN 2016; ATLIN *ET AL.* 2000a).

71 According to CIMMYT (1989) p. 58, “MEs are broad, not necessarily contiguous areas, defined  
72 by similar biotic and abiotic stresses, cropping system requirements ...”. Another definition is a  
73 group of environments that share the same winning genotypes (KANG 2020; GAUCH and ZOBEL  
74 1997), or that within ME there is minimal crossover interaction (COI) among the genotypes grown  
75 among environments (SMITH *ET AL.* 2021). In a group of locations, if genotypes consistently  
76 perform the same relative to each other over a number of seasons, it is considered a ME (SINGH  
77 *ET AL.* 2021, Chapter 4). One way of exploring GEI is to divide the TPE into MEs, and to select  
78 within ME (YAN 2016). Some studies have investigated strategies to subdivide the TPE in maize  
79 (WINDHAUSEN *ET AL.* 2012), barley (ATLIN *ET AL.* 2000b), wheat (GEORGE and LUNDY 2019; BUSTOS-  
80 KORTS 2017), sorghum (DA SILVA *ET AL.* 2021), alfafa (ANNICCHIARICO 2021), rice (KRISHNAMURTHY  
81 *ET AL.* 2017), oat (YAN *ET AL.* 2010), and soybean (ZDZIARSKI *ET AL.* 2019; YAN and RAJCAN 2002).

82 There are several methods for dividing the TPE into MEs. For example, the genotype main ef-  
83 fect plus GEI (GGE) Biplots (YAN *ET AL.* 2000) on soybean MET data was used by ZDZIARSKI *ET AL.*  
84 (2019) to identify two MEs in Midwestern Brazil with contrasting altitudes, levels of fertilizer,  
85 and incidence of soybean cyst nematode profiles. DA SILVA *ET AL.* (2021) and KRISHNAMURTHY  
86 *ET AL.* (2017) also took advantage of GGE Biplots to pinpoint MEs for pre-commercial sorghum  
87 hybrids in Brazil and rice genotypes in India, respectively. For wheat, CRESPO-HERRERA *ET AL.*  
88 (2021) defined three MEs in India with climate and soil data through principal component anal-  
89 ysis, followed by a hierarchical clustering based on Euclidean distance with Ward’s method. For

90 maize in Africa (CIMMYT's program), WINDHAUSEN *ET AL.* (2012) explored historical (2001-2009)  
91 METs data to determine MEs according to five subdivision systems (climate, altitude, geographic,  
92 country, and yield-level), and concluded there was enough genotype by subregion interaction  
93 relative to genotypic variance to justify the selection for the low and high-yielding sub-regions  
94 separately. Other methodologies such as the additive main effects and multiplicative interaction  
95 (AMMI) model (BUSTOS-KORTS 2017; GAUCH and ZOBEL 1997) and factor analytic (FA) models  
96 (SMITH *ET AL.* 2021; BUSTOS-KORTS 2017; SMITH *ET AL.* 2015, 2001b; PIEPHO 1997) also have been  
97 used.

98 It should be noted that the terms subregion, region/regional, subdivision, clusters, zones, agro-  
99 climatic, ecogeographic and MEs are sometimes interchangeably used in the literature. For the  
100 METs data analysis, when MEs are ignored, the baseline model includes genotypes, locations,  
101 years (or the combination location-year, called environment), all two-way and three-way inter-  
102 actions (MALOSETTI *ET AL.* 2013). When MEs are included in the model, it is called a zone-based  
103 model; therefore, yielding zone-based predictions (BUNTARAN *ET AL.* 2019). One of the main ad-  
104 vantages of modeling MEs in a mixed model framework is the ability to borrow information  
105 between zones from the genotype by ME interaction. This is particularly beneficial when fewer  
106 testing locations are available creating a sparse representation of genotypes in some locations  
107 (PIEPHO *ET AL.* 2016; PIEPHO and MÖHRING 2005).

108 The effectiveness of subdividing the TPE into MEs was assessed by ATLIN *ET AL.* (2000a) based  
109 on the theory of correlated response to selection, first applied to the GEI problem by FALCONER  
110 (1952). Effective selection occurs when subdivision increases response to selection, which might  
111 occur if the genotype by ME interaction variance, i.e. genotype by region ( $\sigma_{GR}^2$ ), is large rela-  
112 tive to the genotypic variance ( $\sigma_G^2$ ). In terms of variance components, the GEI is composed of  
113 genotype by location ( $\sigma_{GL}^2$ ), genotype by year ( $\sigma_{GY}^2$ ), and genotype by location by year ( $\sigma_{GLY}^2$ )  
114 interaction variances. Both  $\sigma_{GY}^2$  and  $\sigma_{GLY}^2$  are non-static (unrepeatable) sources of variation. MEs  
115 can be identified with the static portion of the  $\sigma_{GL}^2$ , which is repeatable across years (YAN 2016).  
116 When MEs are identified and modelled, the  $\sigma_{GL}^2$  is partitioned into  $\sigma_{GR}^2$  and genotype by location  
117 within ME ( $\sigma_{GL(R)}^2$ ). Furthermore, the  $\sigma_{GLY}^2$  is partitioned into a genotype by ME by year inter-  
118 action ( $\sigma_{GRY}^2$ ), and genotype by location within ME by year ( $\sigma_{GL(R)Y}^2$ ) interaction (ATLIN *ET AL.*  
119 2000a). Consequently, the estimation of variance components provide important information for  
120 decision-making and accurate estimates are critical.

121 Variance components can be estimated with unbalanced historical data to provide information  
122 for designing novel breeding strategies and optimize resource allocation (AGUATE *ET AL.* 2019).  
123 Efforts have been made to quantify component variability using historical METs data in wheat,  
124 maize, sunflower, sugar beet, potato, rye (MEYER *ET AL.* 2011; LAIDIG *ET AL.* 2008), among other  
125 commercial crops. However, proper modeling of historical data can be a significant challenge  
126 (DIAS *ET AL.* 2020), and if not done properly can lead to erroneous interpretations. In terms of  
127 variance estimates, recent work from AGUATE *ET AL.* (2019) and HARTUNG and PIEPHO (2021) con-  
128 sidered both the imbalance of data (due to selection) and the properties of the residual maximum  
129 likelihood (REML) method (PATTERSON and THOMPSON 1971) to shed light onto the bias of the  
130 estimates obtained from METs using linear mixed models. Their results served as guideline to  
131 design the variance estimation portion of this work, which will be discussed later.

132 With the motivations of identifying and describing MEs for soybean in the primary produc-  
133 tion area of North America, we obtained historical soybean performance (seed yield) data from

134 Uniform Soybean Cooperative Tests (USDA 2021). We purposely chose this dataset because these  
135 trials have been used for decisions on variety release by public breeding organizations. Further,  
136 because flowering in soybean is extremely sensitive to daylength, soybean breeders first classify  
137 experimental genotypes into maturity groups (MGs) and subsequently restrict yield evaluations  
138 to appropriate maturity zones (MZ) that are defined by latitude. Thus, the latitude (MZ) of a  
139 location used for soybean field trials is an implemented element of MEs for soybean field trials.  
140 The dataset consisted of 39,006 unique experimental soybean line yield data from 63 locations  
141 between 1989 and 2019. Note that experimental lines were not evaluated at all locations within  
142 years and most were not evaluated in more than one year. The objectives of this study were to: (i)  
143 investigate if the observed TPE spanning 31 years of trial evaluations can be classified into MEs,  
144 and (ii) estimate probability density functions for the underlying trend of genotypic, genotype  
145 by location, genotype by year, genotype by location by year, and residual variance components.  
146 This modelling approach allowed us to fit parametric probability distributions to variance com-  
147 ponents in order to capture the GEI trend that can be used in future simulation studies, which  
148 will be needed for predicting plant breeding outcomes in changing climates. Currently, simula-  
149 tion studies rely on point estimates of variance components (KLEINKNECHT *ET AL.* 2016), or set  
150 heritability values (such as low or high) (RUTKOSKI 2019). By capturing the GEI trend using his-  
151 torical data, we generate reliable variance estimates that can be used to conduct more realistic  
152 simulation studies.

## 153 5 Data and Methods

### 154 5.1 Phenotypic data

155 Annual PDF reports from the Northern Region of the USDA Uniform Soybean Tests were obtained  
156 from <https://ars.usda.gov/mwa/lafayette/cppcru/ust>. The data retrieved  
157 from the published PDF files represent averages for seed yield for each genotype evaluated at  
158 each location-year combination (*i.e.*, the empirical best linear unbiased estimate, eBLUE), the  
159 CV%, and the number of replicates per trial. Seed yield was adjusted to 13% moisture and results  
160 were reported in bushels per acre (bu/ac). For more information about the trial field plot design  
161 and agronomic practices, please refer to the PDF files. Information from the PDF files were tran-  
162 scribed into CSV format files. The resulting files consist of eBLUE values for seed yield (bu/ac)  
163 of experimental genotypes and check varieties grown in field trials of soybean maturity groups  
164 (MGs) 00 through IV from 1941 to 2020. For our purposes we restricted our analyses to data be-  
165 longing to MGs II and III from 1989 to 2019. Also, unusual data such as data from individual trials  
166 with estimates of reliability ( $i^2$ ) less than 0.10, coefficients of variation (CV%) greater than 20%,  
167 and individual records within trials with estimated means less than 10 bu/ac were removed prior  
168 to further analyses. In addition, locations with less than three years of data were excluded from  
169 further analyses. The resulting data were comprised of 4,257 experimental genotypes evaluated at  
170 63 locations, in 31 years, resulting in 591 location-year combinations (environments) with 39,006  
171 yield values. However, because most experimental genotypes are only grown within appropriate  
172 MZs and are culled on an annual basis, only 0.47% of all potential combinations of experimental  
173 genotypes, locations and years exist in the data sets.

174 For subsequent data analyses, the trials were divided into Preliminary (PYTs) and Uniform



175 Regional (URTs) trials. Experimental genotypes were first evaluated in PTs, and if not culled, were  
176 subsequently evaluated in URTs. Because there are large numbers of experimental genotypes  
177 created by several public breeding programs within each MZ, the PTs are further split into two  
178 groups: PT-A and PT-B. In a given year, a PT was usually conducted at nine or more locations with  
179 two replicates of each experimental genotype evaluated at each location. Experimental genotypes  
180 retained for regional trials were evaluated at 15 locations representing a URT in the next year  
181 with three or four replicates per location. Some experimental genotypes might be evaluated  
182 in two subsequent years of URTs. Experimental genotypes with introgressed transgenic alleles  
183 were evaluated independently in trials referred to as PT/URT-RR or PT/URT-TM, depending on  
184 the transgenes. The field trials at each location utilized a randomized complete block field plot  
185 design. In addition to the experimental genotypes, entries in each field block included common  
186 check varieties ( $\sim 3$ ), but we noted that check varieties were seldom retained for more than four  
187 consecutive years.

## 188 5.2 Environmental data

189 In addition to phenotypic (PHE) data from yield trials, environmental data associated with trial  
190 locations were obtained. Elevation information was obtained from the “elevatr” package (HOL-  
191 LISTER *ET AL.* 2021). Soil characteristics at a depth of 5-15 cm were downloaded from Soilgrids  
192 (<https://soilgrids.org/>) with a modified R script available at <https://github.com/zecojls/downloadSoilGridsV2>, and further processed with the package “raster”  
193 (HIJMANS 2021). The soil characteristics are referred to as soil variables (SV) and included: bulk  
194 density (SV1), cation exchange capacity (SV2), clay content (SV3), total nitrogen content (SV4),  
195 pH (SV5), sand content (SV6), silt content (SV7), and organic carbon content (SV8). Detailed in-  
196 formation about SVs are available in the Soilgrids website. Latitudes for locations in the USA were  
197 downloaded from <https://simplemaps.com/data/us-cities>, and Canadian loca-  
198 tions were obtained using Google Maps. Meteorological data, referred herein as MVs for each lo-  
199 cation were obtained from “NASA’s Prediction of Worldwide Energy Resources” (NASA POWER,  
200 <https://power.larc.nasa.gov/>) with the package “nasapower” (SPARKS 2018), and  
201 further processed with the “EnvRtype” package (COSTA-NETO *ET AL.* 2021). In total, 19 MVs were  
202 retrieved on a daily basis (averages) from the average planting date until the average check vari-  
203 ety maturity date (R8) for each environment (location by year combination). A summary of the  
204 environmental variables is provided in the appendix (Tables A1 and A2), and for more detailed  
205 information, please refer to the cited references.  
206

## 207 5.3 Data analyses

208 A stage-wise approach to analyses composed of multiple models was followed (PIEPHO *ET AL.*  
209 2012; SMITH *ET AL.* 2001a; FRENHAM *ET AL.* 1997). The first-stage analyses were applied to indi-  
210 vidual trials within locations ( $y_1$ ), second-stage analyses were applied to all trials within locations  
211 ( $y_2$ ), and a third-stage analysis was conducted across locations and/or years ( $y_3$ ). All analyses  
212 were implemented using “Asreml-R” version 4 (BUTLER *ET AL.* 2017) in the R programming en-  
213 vironment (R CORE TEAM 2021). Variance components were estimated with REML followed by  
214 estimation/prediction of the fixed and random effects in Henderson’s mixed models (HENDERSON

215 1950, 1963). When possible, computation time was sped-up with parallel processing by applying  
216 the “doParallel” and “foreach” packages (MICROSOFT CORPORATION and WESTON 2020a,b).

### 217 5.3.1 First-stage analyses

218 The first-stage analyses were previously performed by the collaborators, i.e., public soybean  
219 breeders, before the data were submitted to the USDA for aggregating and reporting. Individual  
220 trials within locations were analyzed using a model in which genotypes and blocks were consid-  
221 ered fixed effects, yielding eBLUE values, i.e., entry means for genotypes ( $\mathbf{y}_1$ ). The eBLUE values  
222 were then analyzed with the following model to obtain an estimate of the genotypic variance  
223 ( $\sigma_G^2$ ) that was subsequently used to estimate reliability ( $i^2$ ) on an entry-mean basis:

$$\mathbf{y}_1 = \boldsymbol{\mu} + \mathbf{Z}_g \mathbf{g} + \boldsymbol{\epsilon} \quad (1)$$

224 where  $\mathbf{y}_1$  is the vector of entry means reported for each trial in the PDF files,  $\boldsymbol{\mu}$  is the intercept,  
225  $\mathbf{Z}_g$  ( $m \times m$ ) is the incidence matrix of genotype effects,  $\mathbf{g}$  ( $m \times 1$ ) is a vector of genotype random  
226 effects with  $\mathbf{g} \sim N(\mathbf{0}, \sigma_G^2 \mathbf{I})$ , and  $\boldsymbol{\epsilon}$  is a vector of residuals with  $\boldsymbol{\epsilon} \sim N(\mathbf{0}, \boldsymbol{\Sigma}_1)$ . The residual variance  
227 matrix  $\boldsymbol{\Sigma}_1$  ( $m \times m$ ) is a diagonal matrix with elements equal to  $\frac{1}{\text{SE}^2}$ , where SE is the estimated  
228 standard error (SMITH *ET AL.* 2001a; FRENHAM *ET AL.* 1997). The SE was estimated as  $\frac{\sigma_\epsilon}{\sqrt{r}}$ , where  $\sigma_\epsilon$   
229 is the residual standard deviation calculated from the reported CV%, and  $r$  is the reported number  
230 of replicates for each trial. Because phenotypic values from each replicate are not reported, we  
231 assumed all genotypes from a given trial had the same SE, i.e., equal replication. The  $i^2$  was then  
232 estimated as  $i^2 = \frac{\sigma_G^2}{\sigma_G^2 + \frac{\sigma_\epsilon^2}{r}}$ , where  $\sigma_G^2$  is the genotypic variance and  $\sigma_\epsilon^2$  is the residual variance  
233 (BERNARDO 2020, p. 173). Note  $\sigma_G^2$  could also be estimated from the variance of entry means ( $\sigma_F^2$ ),  
234 where  $\sigma_F^2 = \frac{\sigma_\epsilon^2}{r} + \sigma_G^2$ .

### 235 5.3.2 Second-stage analyses

236 Second-stage analyses utilized data from multiple trials with common entries among trials at the  
237 same location within a year (e.g. PT-A, PT-B, and UT), which were analyzed using:

$$\mathbf{y}_2 = \boldsymbol{\mu} + \mathbf{X}_t \mathbf{t} + \mathbf{X}_g \mathbf{g} + \boldsymbol{\epsilon} \quad (2)$$

238 where  $\mathbf{y}_2$  ( $m \cdot j \times 1$ ) is a vector of eBLUE values for  $m$  genotypes evaluated across  $j$  trials at location  
239  $l$ ,  $\boldsymbol{\mu}$  is the intercept,  $\mathbf{X}_t$  ( $m \cdot j \times j$ ) is the incidence matrix of fixed effects of trials,  $\mathbf{t}$  ( $j \times 1$ ) is a  
240 vector of fixed effects of trials,  $\mathbf{X}_g$  ( $m \cdot j \times m$ ) is the incidence matrix of fixed effects of genotypes,  
241  $\mathbf{g}$  ( $m \times 1$ ) is a vector of fixed effects of genotypes and  $\boldsymbol{\epsilon}$  is a vector of residuals with  $\boldsymbol{\epsilon} \sim N(\mathbf{0}, \boldsymbol{\Sigma}_1)$ .  
242 The elements of the estimated residual variance matrix  $\boldsymbol{\Sigma}_1$  ( $m \cdot j \times m \cdot j$ ) were obtained from the  
243 first stage analyses. Estimates of eBLUE values for genotypes and their SE from model 2 became  
244 input data ( $\mathbf{y}_3$ ) for analyses across locations and years. Note the vector of observations  $\mathbf{y}_1$  refers  
245 to the eBLUE values obtained from individuals trials in a single location, whereas  $\mathbf{y}_2$  refers to  
246 multiple trials connected by checks or any common genotypes in a single location.

### 247 5.3.3 Multi-location and multi-year analyses

248 For the third-stage of analyses the following “baseline” model was used to obtain estimates of  
249 variance components across multiple locations and years:

$$\mathbf{y}_3 = \boldsymbol{\mu} + \mathbf{X}_l \mathbf{l} + \mathbf{Z}_g \mathbf{g} + \mathbf{Z}_{g.l} \mathbf{g.l} + \mathbf{Z}_{yr} \mathbf{yr} + \mathbf{Z}_{g.yr} \mathbf{g.yr} + \mathbf{Z}_{l.yr} \mathbf{l.yr} + \mathbf{Z}_{g.l.yr} \mathbf{g.l.yr} + \boldsymbol{\epsilon} \quad (3)$$

250 where  $\mathbf{y}_3$  ( $mjt \times 1$ ) is a vector of eBLUE values for  $m$  genotypes evaluated across  $j$  locations and  
251  $t$  years,  $\boldsymbol{\mu}$  is the intercept,  $\mathbf{l}$  ( $j \times 1$ ) is a vector of fixed effects of locations,  $\mathbf{g}$  ( $m \times 1$ ) is a vector  
252 of random effects of genotypes with  $g \sim N(\mathbf{0}, \sigma_G^2 \mathbf{I})$ ,  $\mathbf{g.l}$  ( $mj \times 1$ ) is a vector of random effects of  
253 genotype by location interactions with  $g.l \sim N(\mathbf{0}, \sigma_{GL}^2)$ ,  $\mathbf{yr}$  ( $t \times 1$ ) is a vector of random effects  
254 of years with  $yr \sim N(\mathbf{0}, \sigma_Y^2)$ ,  $\mathbf{g.yr}$  ( $mt \times 1$ ) is a vector of random effects of genotype by year  
255 interaction with  $g.yr \sim N(\mathbf{0}, \sigma_{GY}^2)$ ,  $\mathbf{l.yr}$  ( $jt \times 1$ ) is a vector of random effects of location by year  
256 interaction with  $l.yr \sim N(\mathbf{0}, \sigma_{LY}^2)$ ,  $\mathbf{g.l.yr}$  ( $mjt \times 1$ ) is a vector of random effects of genotype  
257 by location by year interaction with  $g.l.yr \sim N(\mathbf{0}, \sigma_{GLY}^2)$ , and  $\boldsymbol{\epsilon}$  is a vector of residuals with  $\boldsymbol{\epsilon}$   
258  $\sim N(\mathbf{0}, \boldsymbol{\Sigma}_2)$ .  $\mathbf{X}_l$  ( $mjt \times j$ ),  $\mathbf{Z}_g$  ( $mjt \times m$ ),  $\mathbf{Z}_{g.l}$  ( $mjt \times mj$ ),  $\mathbf{Z}_{yr}$  ( $mjt \times t$ ),  $\mathbf{Z}_{g.yr}$  ( $mjt \times mt$ ),  
259  $\mathbf{Z}_{l.yr}$  ( $mjt \times jt$ ), and  $\mathbf{Z}_{g.l.yr}$  ( $mjt \times mjt$ ) are incidence matrices for their respective effects. The  
260 elements of the residual variance matrix  $\boldsymbol{\Sigma}_2$  ( $mjt \times mjt$ ) were obtained from model 2.

### 261 5.3.4 Probability distributions of estimated variance components

262 A modified jackknife resampling approach was used to obtain empirical probability distributions  
263 for the variance components  $\sigma_G^2$ ,  $\sigma_{GL}^2$ ,  $\sigma_{GY}^2$ , and  $\sigma_{GLY}^2$ . Following AGUATE ET AL. (2019) and HAR-  
264 TUNG and PIEPHO (2021), the data were divided into four groups representing consecutive eras  
265 of soybean cultivar development: From 1989 to 1995, from 1996 to 2003, from 2004 to 2011, and  
266 from 2012 to 2019. For the first group (1989-1995), there were 181 environments; for 1996-2003,  
267 194 environments; for 2004-2011, 100 environments; and for 2012-2019, 116 environments. The  
268 modified jackknife approach consisted of leaving-one-environment out (instead of one observa-  
269 tion), and then estimating the variance components with a modified version of model 3, that  
270 considered locations as a random effect with variance  $\sigma_L^2$ . Estimates of variance components  
271 were then combined and evaluated for a best fit to probability distributions with the package  
272 “ForestFit” (TEIMOURI 2021). Given the lack of data from individual plots, trial-based estimates  
273 of  $\sigma_\epsilon^2$  from the first-stage of analyses were used (i.e., no resampling). Distributional parameters  
274 were estimated via the expectation maximization (EM) algorithm (DEMPSTER ET AL. 1977) using  
275 the log-likelihood functions of the Gamma, Log-Logistic, Log-Normal, Burr, and F univariate and  
276 multivariate distributions. In addition to a visual comparison of the modeled distributions rela-  
277 tive to the empirical distributions, Akaike (AIC) and Bayesian (BIC) information criteria (AKAIKE  
278 1974; SCHWARZ 1978) as well as the Kolmogorov-Smirnov (KS), Cramer-von Mises (CM), and  
279 Anderson-Darling (AD) goodness-of-fit statistics (STEPHENS 1986) were considered to select the  
280 best-fit distribution for each variance component. A classical penalized criteria based on the  
281 loglikelihood (AIC, BIC) provided protection from overfitting.

### 282 5.3.5 Identification of mega-environments

283 Herein, “ME” and “cluster” are used interchangeably. We clustered 63 locations using six criteria:  
284 (i) phenotype, i.e., seed yield (PHE), (ii) eight soil variables (SVs) plus elevation (SoilE); (iii) lati-



285 tude, where locations were split into two groups (Lat2), (iv) latitude, where locations were split  
286 into three groups (Lat3); (v) 19 meteorological variables (MVs) with means across years (WA); and  
287 (vi) MVs with means nested within years (WW).

288 With the exception of Lat2 and Lat3, the optimal number of clusters was then defined based  
289 on the Silhouette and Elbow methods using the package “factoextra” (KASSAMBARA and MUNDT  
290 2020), followed by a K-means clustering with the R base function *kmeans()* allowing for a maxi-  
291 mum of 1,000 iterations and 100 multiple initial configurations of the  $K$  groups.

### 292 5.3.5.1 Clustering of PHE data

293  
294 Several variance-covariance structures (VCOV) for the genotype by location ( $\Sigma_{gl}$ ) and genotype  
295 by year ( $\Sigma_{gy}$ ) interaction terms in model 3 were evaluated. The simplest model (M3-1) assumed  
296 independent years and locations with homogeneous variances. The next set of models allowed  
297 heterogeneous variances for locations (M3-2), years (M3-3), or both (M3-4). Specific pairwise  
298 covariances for both  $\Sigma_{gl}$  and  $\Sigma_{gy}$  were assessed with models M3-5, M3-6, ..., to M3-20. In all  
299 cases, the elements of the residual matrix was assumed to be known (Model 2). Results from 19  
300 evaluated models are presented in Table 1. The VCOV models included identity (**I**), diagonal (**D**),  
301 and factor-analytic (**FA<sub>k</sub>**) of order  $k$  (PIEPHO 1997; SMITH *ET AL.* 2001b, 2015). The best-fit model  
302 was selected according to the AIC selection criteria. For the FA models, the overall percentage  
303 of genetic variance accounted by each  $k$  factor, defined as  $100[\text{tr}(\Lambda\Lambda')/\text{tr}(\Lambda\Lambda' + \Psi)]$ , where “tr”  
304 is the trace of the matrix,  $\Lambda$  ( $j \times k$ ) is the matrix of loadings, and  $\Psi$  ( $j \times j$ ) is a diagonal matrix  
305 of specific variances associated with each location, was also considered. Models were selected  
306 based upon the AIC, the overall percentage of genotype by location [% Var(GL)] and genotype  
307 by year [% Var(GY)] variances explained by the FA models. With the best-fit FA model, locations  
308 were clustered based on the estimated  $\Sigma_{gl}$  loadings (BUSTOS-KORTS 2017; BURGUEÑO *ET AL.* 2008)  
309 after Varimax rotation. Genetic correlations between locations (**C**) were further estimated by  
310  $\mathbf{C} = \mathbf{DGD}$ , where  $\mathbf{G} = (\Lambda\Lambda' + \Psi)$  is the estimator of genetic variances, and **D** is a diagonal  
311 matrix composed by the inverse of the square root of the diagonal values of **G** (SMITH *ET AL.*  
312 2015).

### 313 5.3.5.2 Clustering of SV data

314  
315 First the SVs (including elevation) were centered and scaled to a unit variance. Subsequently,  
316 a principal component analysis (PCA) by non-linear iterative partial least squares (WOLD 1966)  
317 was performed to reduce collinearity with the “pcaMethods” package (STACKLIES *ET AL.* 2007). The  
318 number of principal components (PC) was selected with a 90% threshold of cumulative variance  
319 explained, followed by a Varimax rotation.

### 320 5.3.5.3 Clustering of MV data

321  
322 Prior to conducting cluster analyses, a Critical Environmental Regressor through Informed Search  
323 (CERIS) procedure proposed by LI *ET AL.* (2018) was used to identify relevant MVs. The method  
324 consists of screening meteorological data in all environments to identify a period (window) of  
325 days after planting with the greatest Pearson correlation between the population means (i.e.,

environmental means) and the MVs. The idea is to identify periods of meteorological data that are most likely to affect stages of growth and development associated with the phenotypic results (yield, plant height, etc.). We further modified their approach to account for genotype by location deviations within years as follows:

$$\mathbf{y}_3 = \boldsymbol{\mu} + \mathbf{X}_l \mathbf{l} + \mathbf{X}_g \mathbf{g} + \boldsymbol{\epsilon} \quad (4)$$

where  $\mathbf{y}_3$  ( $m_j \times 1$ ) is a vector eBLUE values of  $m$  genotypes in  $j$  locations,  $\boldsymbol{\mu}$  is the intercept,  $\mathbf{l}$  ( $j \times 1$ ) is a vector of fixed effects of locations,  $\mathbf{g}$  ( $m \times 1$ ) is a vector of fixed effects of genotypes, and  $\boldsymbol{\epsilon}$  is a vector of residuals with  $\boldsymbol{\epsilon} \sim \mathbf{N}(\mathbf{0}, \boldsymbol{\Sigma}_2)$ .  $\mathbf{X}_l$  ( $m_j \times j$ ) and  $\mathbf{X}_g$  ( $m \times m$ ) are incidence matrices for their respective effects, and  $\boldsymbol{\Sigma}_2$  ( $m_j \times m_j$ ) was previously defined. Model 4 was applied within years. The residuals represent the genotype by location deviations nested within years. Each location was then represented as the average of the residuals squared. The CERIS was computed for observed location-year combinations within (WW) and across years (WA), and the best window (i.e., highest correlation) for each of the MVs was selected for clustering. For WA, correlations were computed for each MV with the 591 observed environments. For example, if a given location was observed in five out of 31 years, five environmental means were computed with the same selected window, and the location represented as the mean of these five values. On the other hand, for WW, each observed year can have its own best window. A minimum window of seven days was considered in all cases. After identifying the most relevant window for each MVs, the resulting data were centered and scaled to unit variance. Subsequently clustering was conducted as described for the SVs. Note that for both WA and WW, the input data for the clustering analysis was a matrix of centered and scaled environmental means with dimension of 63 rows by 19 columns, which represent the number of locations and MVs, respectively.

#### 5.3.5.4 Effectiveness of clustering

We used the ratio of correlated responses from selection across all environments relative to direct responses to selection within MEs (CR/DR) (ATLIN *ET AL.* 2000a; BUSTOS-KORTS 2017) as a metric to assess the relative effectiveness of clustering environments into MEs. As previously demonstrated, CR/DR can be determined using variance components obtained from linear models:

$$\begin{aligned} \mathbf{y}_3 = & \mathbf{X}_r \mathbf{r} + \mathbf{Z}_{l(r)} \mathbf{l}_{(r)} + \mathbf{Z}_g \mathbf{g} + \mathbf{Z}_{g,l_r} \mathbf{g} \cdot \mathbf{l}_{(r)} + \mathbf{Z}_{y,y} \mathbf{y} + \mathbf{Z}_{y,r} \mathbf{y} \cdot \mathbf{r} \\ & + \mathbf{Z}_{g,r} \mathbf{g} \cdot \mathbf{r} + \mathbf{Z}_{l_r,y} \mathbf{l}_{(r)} \cdot \mathbf{y} + \mathbf{Z}_{g,y} \mathbf{g} \cdot \mathbf{y} + \mathbf{Z}_{g,y,r} \mathbf{g} \cdot \mathbf{y} \cdot \mathbf{r} + \mathbf{Z}_{g,y,l_r} \mathbf{g} \cdot \mathbf{y} \cdot \mathbf{l}_{(r)} + \boldsymbol{\epsilon} \end{aligned} \quad (5)$$

where  $\mathbf{r}$  is a vector of fixed effects of clusters, and  $\mathbf{l}_{(r)}$ ,  $\mathbf{g} \cdot \mathbf{l}_{(r)}$ ,  $\mathbf{y} \cdot \mathbf{r}$ ,  $\mathbf{g} \cdot \mathbf{r}$ ,  $\mathbf{l}_{r} \cdot \mathbf{y}$ ,  $\mathbf{g} \cdot \mathbf{y} \cdot \mathbf{r}$ , and  $\mathbf{g} \cdot \mathbf{y} \cdot \mathbf{l}_{r}$ , are random vectors with specific variances of locations within clusters, genotype by location within clusters interaction, year by clusters interaction, genotype by cluster interaction, locations nested in clusters by year interaction, and genotype by year by location within clusters, respectively.  $\mathbf{X}_r$ , and  $\mathbf{Z}_{l_r}$  up to  $\mathbf{Z}_{g,y,l_r}$ , are incidence matrices for their respective effects and dimensions. The remaining model terms were previously defined.

Estimates of variance components from model 5 were used to obtain CR/DR:

$$CR/DR = \rho_g \sqrt{\frac{i_L^2}{i_{SR}^2}} \quad (6)$$

where  $\rho_g$  is the correlation between estimated genotypic effects in the non-clustered and clustered sets of environments and  $i_L^2$  and  $i_{SR}^2$  are the estimated reliabilities of genotype means in the non-clustered and clustered sets of environments, respectively. If  $CR/DR < 1$ , response to selection will be more effective if selections are made within clusters (ATLIN *ET AL.* 2000a; BUSTOS-KORTS 2017). Note that it is possible for  $CR/DR > 1$ , indicating that selection will be more effective if selection is based on eBLUE values obtained from non-clustered environments. As per (ATLIN *ET AL.* 2000a) The terms in equation 6 are defined as follows:

$$\rho_g = \frac{\sigma_G^2}{\sqrt{\sigma_G^2(\sigma_G^2 + \sigma_{GR}^2)}} \quad (7)$$

$$i_L^2 = \frac{\sigma_G^2}{\sigma_G^2 + \frac{\sigma_{GR}^2}{nr} + \frac{\sigma_{GL(R)}^2}{nl \times nr} + \frac{\sigma_{GY}^2}{ny} + \frac{\sigma_{GRY}^2}{ny \times nr} + \frac{\sigma_{GL(R)Y}^2}{nl \times nr \times ny}} \quad (8)$$

$$i_{SR}^2 = \frac{\sigma_G^2 + \sigma_{GR}^2}{\sigma_G^2 + \sigma_{GR}^2 + \frac{\sigma_{GL(R)}^2}{nl} + \frac{\sigma_{GY}^2}{ny} + \frac{\sigma_{GRY}^2}{ny} + \frac{\sigma_{GL(R)Y}^2}{nl \times ny}} \quad (9)$$

where  $\sigma_G^2$ ,  $\sigma_{GR}^2$ ,  $\sigma_{GL(R)}^2$ ,  $\sigma_{GY}^2$ ,  $\sigma_{GRY}^2$ , and  $\sigma_{GL(R)Y}^2$  are the genotypic, genotype by cluster, genotype by location nested in cluster, genotype by year, genotype by clusters by year, and genotype by location nested in cluster by year variance components, respectively.  $nr$  and  $ny$  are the harmonic means for the number of clusters and years in which genotypes were observed, respectively.  $nl$  is the median number of locations, obtained from harmonic means within clusters. The residual terms were omitted due to the lack of replicated data within environments.

The Jaccard similarity coefficient was used to compare the coincidence of locations within cluster across clustering-types. For the sake of simplicity, only the  $\sigma_{GR}^2$  was estimated for each clustering-type with the jackknife approach presented in section 5.3.4. Lastly, to evaluate if locations were simply allocated to clusters by chance, we randomly assigned locations into two, three, and four clusters, and assessed its CR/DR. This process was repeated 100 times.

## 6 Results

### 6.1 Single-trial and location analysis

The number of evaluated genotypes by year including checks ranged from 126 to 233, and the number of locations per year ranged from 10 to 32 (Table A3). Estimates of  $i^2$  from single-trial analyses ranged from 0.10 to 0.99, with a median value of 0.55 (Figure 1). The majority of trials (844 out of 1423) had  $i^2$  values greater than 0.50. The coefficient of variation (CV%) ranged from 1.30 to 19.9%, with a median value of 7.60% (Figure 1-A). Genotypic eBLUE values ranged from 10.16 to 112.40 bu/ac. Across years, there has been a positive trend for seed yield with an average increase of 0.49 bu/ac per year (Figure 1-B), although the relative contributions of genetic and non-genetic factors to this trend requires further analyses and is the subject of future research.

## 6.2 Variance components

Most of the estimated phenotypic variance for seed yield among annual soybean field trials has been due to location ( $\sigma_L^2$ ) and location by year interaction ( $\sigma_{LY}^2$ ) effects (Table 2). Among the estimated GEI variance components ( $\sigma_{GL}^2 + \sigma_{GY}^2 + \sigma_{GLY}^2$ ), the static contribution ( $\sigma_{GL}^2$ ) represented 26.30% (Table 2, model M3-1).

Estimated variance components reveal distinct multi-modal distributions over time (Figure 2). For example, the estimated genotypic variance ( $\sigma_G^2$ ) more than doubled from  $\sim 3.54$  (bu/ac)<sup>2</sup> for the period 1989-1995 to  $\sim 7.56$  (bu/ac)<sup>2</sup> for the period 1996-2003. For the years 2004-2011, the estimated  $\sigma_G^2$  decreased to  $\sim 6.67$ , but then increased to  $\sim 7.49$  for the most recent period of 2012 to 2019. While the smallest magnitudes of estimated GEI variance components were usually associated with the period from 1989 to 1995, subsequent changes across years were unique to each of the estimated variance component. A similar pattern was observed for empirical estimates of location, year, and location by year interaction variances (Figure A1).

Several multi-modal models were evaluated for goodness of fit for the empirical distributions of variance components (Table A4). The best-fit models for variance components across time consisted of: a mixture of five Log-Logistic distributions for the empirical distribution of  $\sigma_G^2$ , three Log-Logistic distributions for the empirical distribution of  $\sigma_{GL}^2$ , six Log-Logistic distributions for the empirical distribution of  $\sigma_{GY}^2$ , and five Gamma distributions for the empirical distribution of  $\sigma_{GLY}^2$  (Figure 3). For the empirical distribution of estimated residual variances ( $\sigma_e^2$ ), obtained directly rather than through jackknife resampling, the best-fit model was a univariate Log-Logistic distribution (Figure 4). Maximum Likelihood estimates for the distributional model parameters are reported for the selected models (Table 3).

The criteria for determining best-fit models included low AIC and BIC values, goodness of fit statistics (KS, CM, AD), as well as visual graphical alignment of the model with the plotted empirical distributions. In total, 102 models were assessed. Plots with empirical and fitted cumulative distribution functions are provided in Figures A2 and A3.

## 6.3 Clusters of meta-environments

The six clustering criteria revealed that the observed 63 environments can be divided into at least two and at most three MEs. Clusters based on PHE criteria had the best (lowest) relative effectiveness value, CR/DR = 0.62 (Table 4). This value was computed using results from analysis from model 5, and PHE determined by estimates of genotype by location interaction ( $\Sigma_{gl}$ ) from model M3-18 (Table 1). The simplest, but unrealistic model (M3-1) assumed homogeneous and independent variances and had the greatest AIC value.

For PHE, the optimal number of clusters was three, while for SoilE, WW, and WA it was two. For all clustering types, both Silhouette and Elbow criteria indicated similar results (Figure A4). The number of environments within clusters ranged from 7 to 54 (Table 4 and Figure 5). Calculated Jaccard distance metrics among the clusters created by different criteria showed that many clusters have common members. Out of the 75 pairwise similarity indexes, 68 presented non-zero values. The greatest similarity was between clusters 1 and 2 from PHE and Lat2, respectively (Table A5).

The best-fit model (M3-18) accounted for heterogeneous variances and pairwise genetic correlations with FA matrices of order  $k = 5$  and  $k = 2$  for  $\Sigma_{gl}$  and  $\Sigma_{gly}$ , accounting for 90.2% and

430 87.2% of the genetic variances, respectively (Table 1). Pairwise genetic correlations between the  
431 63 observed locations show a higher average correlation within phenotypic clusters compared to  
432 across phenotypic clusters (Figure A5).

433 Prior to k-means clustering, a non-linear PCA was performed with centered and scaled en-  
434 vironmental variables (elevation, SV, and MV). The non-linearity relationship for most variables  
435 was evident from scatterplots (Figures A6, A7, and A8). For SoilE, WA, and WW, the selected num-  
436 ber of PC were five (93.06% of variance explained), four (93.42%), and six (91.12%), respectively  
437 (results not shown). Furthermore, for MV, just a small proportion of the data was used due to the  
438 CERIS biological filter. For WA, the CERIS revealed that four out of 19 variables had negative cor-  
439 relations between genotype by location deviations and the mean of the environmental variable  
440 for the selected window. The selected windows (i.e., with the highest Pearson correlation) were  
441 smaller than 20 days, and most of them started at the beginning of the cropping season (Table A1  
442 and Figure A9). For WW and for the sake of simplicity, only the highest window for each MV are  
443 presented (Table A2), although locations were clustered as described in section 5.3.5.3.

444 The effectiveness of clustering was assessed using CR/DR, which compares the response to  
445 selection in the divided and undivided sets of environments. The metric, computed from es-  
446 timated variance components from model 5 for each clustering type, presented ratios smaller  
447 than one in five out of the six cases. These results suggested an improvement in the response  
448 to selection when selecting directly within clusters (i.e., regions, ME) versus selecting across all  
449 locations for PHE, SoilE and Lat2, while a moderate response to selection was suggested for Lat3  
450 and WA. For WW, no improvements were predicted. The relative effectiveness metric is affected  
451 by the correlation between genotypic effects in the undivided and divided sets of environments  
452 ( $\rho_g$ ) and the reliability within subregion ( $i_{SR}$ ). The PHE presented the lowest  $\rho_g$  value with an  
453 increase in the reliability (from  $i_L^2$  to  $i_{SR}^2$ ), followed by Lat2 and SoilE. For Lat3 and WA, although  
454 effective, the reliabilities remained constant. Regarding the differences within fitted clusters, for  
455 SoilE, with the exception of pH and bulk density, all variables presented a big contrast between  
456 the two clusters. For WA, these differences were more subtle. For example, for growing degree-  
457 days (GDD), clusters 1 and 2 presented a mean difference of 2.61 units. For temperature related  
458 variables (mean, maximum, minimum, and range), the difference ranged between 0.21 and 2.94  
459 units. When locations were randomly assigned to two, three, or four clusters, the mean CR/DR  
460 values were always bigger than one, with large decreases in the reliability (Table 4).

461 REML estimates of variances decreased for  $\sigma_G^2$  when clusters were included in the complete  
462 dataset, with the exception of WW. The observed ratios  $\sigma_{GR}^2/\sigma_G^2$  and  $\sigma_{GR}^2/\sigma_{GL}^2$  were greater  
463 than 0.50 for PHE, SoilE, and Lat2. In terms of the partitioning of  $\sigma_{GL}^2$ , the  $\sigma_{GL(R)}^2$  portion was  
464 substantially reduced for PHE, Lat2, and Lat3. The  $\sigma_{GR}^2$  was better captured by PHE, SoilE, and  
465 Lat2, being ineffective for WW (estimate bounded at zero due to REML properties). On the other  
466 hand, for  $\sigma_{GLY}^2$ , just a small portion of the variation was captured by  $\sigma_{GRY}^2$  (Table 2). Both PHE  
467 and Lat2 clustering types were able to greatly capture  $\sigma_{GR}^2$  according to analysis for each group  
468 of years (Figure 6). Lastly, large reductions in the variation of years ( $\sigma_Y^2$ ) were observed for SoilE  
469 and Lat2.



## 7 Discussion

Analyses of balanced data sets produced by METs using least square and mixed model estimators provide unbiased estimates of variance components. However, data generated by annual PYTs and URTs are unbalanced and sparse because every year most field plots (experimental units) are reserved for new experimental genotypes and most previously evaluated experimental genotypes are culled on an annual basis. For example, reports of soybean seed yield in MZ's II and III evaluated in PYTs and URTs conducted from 1989 and 2019 included less than one percent of all possible combinations genotypes, locations and years. As a consequence estimators of the variance components are biased (ROTHSCHILD *ET AL.* 1979). A question to consider is whether the biased estimators produce large bias in the estimates.

An additional challenge in using soybean seed yield data from PYTs and URTs is that the data consist of eBLUE values from individual trials within locations for each genotype. These values were transcribed from reports of individual trials formatted as PDF files. To the best of our knowledge, all genotypes were evaluated in replicated field trials organized as randomized complete block design (RCBD's) that were analyzed with a linear model consisting of fixed block and genotypic effects and random residual effects, where the residual effects were assumed to be estimated using equal numbers of replicates per genotype within a field trial. Implicitly this is equivalent to assuming there were no missing plots within any of the field trials, which is highly unlikely. Further, the estimates of  $\sigma_{GLY}^2$ ,  $\sigma_{GL}^2$  and  $\sigma_{GY}^2$  are confounded and biased by  $\sigma_{\epsilon}^2$ , i.e., plot to plot variability.

A consequence of using eBLUE values instead of individual plot data is that estimates of variance components needed to be obtained in multiple stages. If the reports of field trials had provided individual plot data it would have been possible to produce a variance-covariance matrix associated with adjusted means from each trial. Indeed, if individual plot data are provided, the field plot designs need not be restricted to RCBD's wherein the covariances among plots may be substantial and assumptions of independence among plots is inappropriate (MÖHRING and PIEPHO 2009). Under such field conditions use of spatial models and lattice designs where replicates are considered fixed and blocks as random effects (MÖHRING *ET AL.* 2015) can be utilized and the mixed model framework can provide appropriate weights for analyses of data combined across trials, locations and years. Toward this goal public soybean breeders are working with curators of "SoyBase" (Drs. Rex Nelson and David Grant, personal communication, 2020) to include results from individual plots in future reports of PYTs and URTs.

If data were obtained from only URTs they would provide very little information for estimating  $\sigma_{GLY}^2$  and  $\sigma_{GY}^2$  because most experimental genotypes are not grown for more than one year of URTs. Although check varieties were replicated across multiple years, the checks are a small sample of genotypes representing mostly commercial varieties. Thus, interpretation of variance components based on only check varieties is limited. In order to broaden the inferences about interactions involving genotypes and years in MZs II and III, we included eBLUE values from the PYTs, thus providing at least two years of data for a broader base of genotypes.

Even with inclusion of data from PYTs there is potential for bias in the estimates of  $\sigma_{GLY}^2$ ,  $\sigma_{GL}^2$ ,  $\sigma_{GY}^2$ , and  $\sigma_G^2$  due to the phenomenon of missing data between years. Many of the experimental genotypes evaluated in the PYTs will be culled before becoming entries in a subsequent year of URTs. As a consequence, the missing data are missing at random (MAR). If genotypes are MAR, selection is ignorable, and hence they will produce unbiased estimates of variance components

514 in likelihood-based analysis (PIEPHO and MÖHRING 2006; ROTHSCHILD *ET AL.* 1979). Note MAR  
515 does not state the missing genotypes are randomly eliminated (*i.e.*, no selection), but instead it  
516 depends on the observed data due to selection (PIEPHO and MÖHRING 2006). Also, URTs can have  
517 experimental genotypes that were not included in a previous year of PYTs, a condition known as  
518 missing completely at random (MCAR) (LITTLE and RUBIN 2020; RUBIN 1976). Fortunately recent  
519 work from HARTUNG and PIEPHO (2021) demonstrated that both MAR and MCAR conditions for  
520 field trials conducted in sequential years result in minor bias for likelihood-based estimators of  
521 variance components (PIEPHO and MÖHRING 2006; LITTLE and RUBIN 2020; HARTUNG and PIEPHO  
522 2021), a result previously noted for MAR by PIEPHO and MÖHRING (2006).

523 For the sake of interpreting variance components involving genotypes, we recognize that  
524 PYTs and URTs include genotypes from multiple breeding programs. Each breeding program op-  
525 erates independently with distinct breeding objectives and breeding strategies for distinct mar-  
526 kets. For example, a couple of the breeding programs have objectives that include not only high  
527 seed yields, but also greater seed protein for food markets. Seed protein is negatively correlated  
528 with seed yield. Thus, the estimates of variance components involving genotypes from these  
529 trials is likely greater than it is for any individual breeding program.

530 Despite the various caveats mentioned above, the eBLUE values for genotypes from both PYTs  
531 and URTs provided estimates of variance components with similar relative magnitudes as other  
532 studies. For example, we determined that environmental, *i.e.*, non-genetic sources of variability  
533 were the predominant source of variance for seed yield. Similar results were found in wheat in  
534 California (USA) (GEORGE and LUNDY 2019), winter wheat field trials in Germany between 1983  
535 to 2014 (LAIDIG *ET AL.* 2017a) and winter rye (LAIDIG *ET AL.* 2017b). Estimates of variance com-  
536 ponents (Table 2) revealed that the interactions of genotype with locations ( $\sigma_{GL}^2$ ) was larger than  
537 genotype by year interactions ( $\sigma_{GY}^2$ ). Also, the three-way interaction among genotype, location,  
538 and years ( $\sigma_{GLY}^2$ ), was greater than either of the two way interactions involving genotypes. The  
539 same pattern was observed when years were combined into four 7 to 8 years periods. FRIESEN  
540 *ET AL.* (2016) found similar results for winter wheat evaluated in Canada from 2000 to 2009, where  
541 the reported  $\sigma_{GLY}^2$  represented 4.1% of the total variation, and both  $\sigma_{GL}^2$  and  $\sigma_{GY}^2$  together rep-  
542 resented less than 2%. Similar trends were also observed for yield in wheat (GEORGE and LUNDY  
543 2019; LAIDIG *ET AL.* 2017a; ARIEF *ET AL.* 2015), rye (LAIDIG *ET AL.* 2017b), barley, maize, and sun-  
544 flower (LAIDIG *ET AL.* 2008). While seed yields for multiple crops indicate  $\sigma_{GL}^2 > \sigma_{GY}^2$ , it is  
545 not consistent for all traits. For example, LAIDIG *ET AL.* (2017b) evaluated the variation in crude  
546 protein content, amylogram viscosity and temperature in winter rye varieties, and reported that  
547  $\sigma_{GY}^2 > \sigma_{GL}^2$ , and that the year-to-year ( $\sigma_Y^2$ ) variation was more important than the variation from  
548 location to location ( $\sigma_L^2$ ). Authors attributed this to the rye seed susceptibility towards wetness,  
549 low temperature, and radiation during harvest time.

550 AGUATE *ET AL.* (2019) simulated different METs with variable numbers of genotypes, loca-  
551 tions and years to mimic wheat trials. They found that adding years is more beneficial than  
552 adding genotypes or locations for obtaining unbiased estimates of genotypic related variance  
553 components. Furthermore, even in highly imbalanced datasets, estimates from at least 8 years of  
554 trials produced less than 5% bias in the estimates, compared to biases of  $\sim 18\%$  for  $\sigma_G^2$ ,  $>40\%$  for  
555  $\sigma_{GL}^2$ , and  $>15\%$  for  $\sigma_{GY}^2$ , when only two years of METs were considered. Simulation results from  
556 HARTUNG and PIEPHO (2021) further demonstrated that non-significant bias can be achieved for  
557 estimates of  $\sigma_G^2$ ,  $\sigma_{GL}^2$ , and  $\sigma_{GY}^2$ , with decreasing dropout rate and increasing number of years of  
558 testing. Given the dropout rate relies on the objectives and budget constraints of the breeding

559 program, in order to be confident with the REML estimates of variances obtained from METs,  
560 they recommended that at least seven to eight years of trials should be included. This result and  
561 the fact that soybean breeding cycles in public programs require seven to eight years, we created  
562 four subsets of data consisting of seven to eight years. The reader should keep in mind that the  
563 goal of minimizing bias in estimators is distinct from the magnitude and proportion of estimates  
564 of variance components. The former is a concern for algorithmic estimators while the latter is of  
565 concern for breeding decisions about whether to use more locations or more years in their crop  
566 species and for traits under selection.

567 Estimates of variance components were also used to fit parametric probability distributions  
568 and to quantify the effectiveness of dividing the sampled 63 environments/locations into MEs.  
569 For the distributions, a jackknife resampling approach was implemented and consisted of leaving-  
570 one-environment out and estimating the variance components in each group of years (1989-1995,  
571 1996-2003, 2004-2011, 2012-2019). The selected distributions were Log-Logistic and Gamma (Ta-  
572 bles 3 and A4). Especially due to the well-known properties of the analysis of variance (ANOVA)  
573 among the breeding community, there is a misconception regarding the distribution of estimates  
574 of variance components. If the underlying population are normally distributed, the mean squares  
575 are distributed as a chi-square ( $\chi^2$ ), whereas normality and independence are requirements to  
576 compute valid F tests from ANOVA (RENCHE and SCHAALJE 2007, Chapter 5). The  $\chi^2$  distribu-  
577 tion is further used for inferences about variance uncertainty, but as mentioned, it does assume  
578 that the random variable is normally distributed. The computed empirical distributions from  
579 jackknife can be of any form (distribution), likewise other approaches such hierarchical Bayesian  
580 models can be employed to obtain posterior distributions of variance estimates. But regardless of  
581 the type of inference, our motivation was essentially to capture the GEI trend. For example, the  
582 point estimate for the genotype by location variance in the whole period was  $\hat{\sigma}_{GL}^2 = 4.8$  (bu/ac)<sup>2</sup>  
583 (Table 2). This is a valid estimate, however, it does not allow a trend quantification. The GEI trend  
584 are crucial as they can be incorporated in simulation pipelines to depict genetic and non-genetic  
585 trends, which is current a topic under investigation.

586 Logically, plant breeders are motivated to ask: What is an environment? COSTA-NETO and  
587 FRITSCHÉ-NETO (2021) defined environment as “... an emergent property derived from the balance  
588 of inputs and frequency across the plant’s lifetime,” and from an agronomic point of view, “... a  
589 certain time window between planting date and harvesting.” Over 60 years ago, COMSTOCK, R. E.  
590 and MOLL (1962) described the differences between micro and macro-environment, and explained  
591 that GEI is the result of fluctuations in the macro-environment during a crop’s lifetime. More  
592 recently, introduction of enviromics/envirotyping (COSTA-NETO *ET AL.* 2021; XU 2016; COOPER  
593 *ET AL.* 2014), coupled with high-throughput phenotyping/genotyping are being investigated as  
594 an approach to connect environment and biology for sustainable food production. While some  
595 agronomic research has focused on variation among agronomic systems linked with ideotype  
596 breeding, genotypic sources of variability continue to be the primary approach used for genetic  
597 improvement by plant breeders.

598 Results from the cluster analyses showed that all sampled environments can be effectively  
599 divided into three clusters using FA models. The obtained clusters can be considered disjoint  
600 subsets of environments with minimal genotypic crossover interaction (COI) (BURGUEÑO *ET AL.*  
601 2008; COOPER and DELACY 1994). BURGUEÑO *ET AL.* (2008) analysed a maize MET dataset from  
602 CIMMYT and identified five clusters of environments by fitting a FA(2) model. The authors com-  
603 puted the Euclidean distance between pairs of environments from the estimated loading matrix

604 ( $\Lambda$ , rotated with singular value decomposition), and environments were clustered based on com-  
605 plete linkage clustering strategy. BUSTOS-KORTS (2017) analysed data embracing TPE in Denmark,  
606 Germany, The Netherlands, and the United Kingdom, with a FA(1) model. The results suggested  
607 improvements in the response to selection mostly for Denmark, where the CRS ratio was 0.93.  
608 More recently, SMITH *ET AL.* (2021) proposed a new way to define groups of environments that  
609 exhibit minimal COI based on FA models. The idea is to take advantage of the traditional in-  
610 terpretation of factor and principal component analysis, and classify environments into clusters  
611 based on the sign (positive or negative) of the estimated and rotated factor loadings.

612 The identification of homogeneous environments was also accomplished by considering soil  
613 plus elevation (SoilE) and meteorological variables when CERIS was applied across environments  
614 (WA). The rationale is that a portion of the GEI results from static, repeatable variation (CRESPO-  
615 HERRERA *ET AL.* 2021; YAN 2016). It is well-known that temperature is a key driving force in the  
616 rate of seasonal plant growth (SETIYONO *ET AL.* 2007), which is why GDD is commonly a base  
617 unit in crop models (HOLZWORTH *ET AL.* 2014). Photoperiod plays a significant role in soybean  
618 plant development, notably the change from vegetative to reproductive growth. Floral induction  
619 is essentially daylength and temperature-independent (i.e. conversion of shoot apical and nodal  
620 meristems from a vegetative to floral mode). In soybeans, this induction occurs as soon as the  
621 first unifoliate leaflets emerge and expand, becoming capable of measuring the night length  
622 (from dusk to dawn). Once floral induction occurs at a given apical or axillary node, the few-  
623 celled vegetative apical zone is transformed from a vegetative development pathway into a floral  
624 inflorescence development pathway. The development pathway is back under thermal control  
625 (SETIYONO *ET AL.* 2007). Soybean is a quantitative long-night length sensing (not a short-day  
626 length sensing), and hence highly influenced by photoperiod and therefore by the latitude of  
627 the growing region/trial (JACKSON 2009). This is a major reason that different soybean maturity  
628 groups are grown at different latitudes (MOURTZINIS and CONLEY 2017). The estimated clusters  
629 (with the exception of the *ad-hoc* Lat2 and Lat3) follow a certain pattern in terms of latitude,  
630 which was also confirmed by the Jaccard similarity. In addition, the inclusion of the URT data  
631 in SoyBase would facilitate identifying critical crop growth periods in order to narrow down the  
632 amount of environmental data used by CERIS.

633 Herein, we identified MEs through reliable estimates of variance components. However, other  
634 environmental subsets would have been formed using different clustering strategies (BURGUEÑO  
635 *ET AL.* 2008). Given this type of approach is an unsupervised learning (i.e., we do not know the  
636 truth about MEs), the objective is always to discover an interpretable grouping of members. We  
637 addressed interpretation using effectiveness of clustering (ATLIN *ET AL.* 2000a). Other strategies  
638 for clustering can also be tested, for example, empirical knowledge of the TPE. But regardless of  
639 the definition/identification of MEs, breeders can take advantage of best linear unbiased predic-  
640 tion (BLUP) that borrows information (strength) between MEs from the genotype by ME inter-  
641 actions. This type of modelling can be highly beneficial for MEs that rely on a small number of  
642 locations (BUNTARAN *ET AL.* 2021; PIEPHO *ET AL.* 2016; PIEPHO and MÖHRING 2005). A natural con-  
643 tinuation for this work would be to (i) evaluate the effectiveness of a combined cluster from soil,  
644 elevation, and meteorological variables filtered by CERIS; (ii) evaluate if BLUP based-models will  
645 improve the selection response upon regionalization in the Uniform Soybean Cooperative Tests;  
646 (iii) select an appropriate model that might account for heterogeneous covariances among MEs  
647 as well genetic relationships, because we confined attention to the compound symmetry model  
648 in order to facilitate comparison of the different clustering types; and (iv) leverage how far back



649 in the historical data should we go in order to take maximum advantage of the data in current  
650 models. It is also worth investigating if modelling maturity groups (specially when more data is  
651 considered) would enhance the ability of finding meaningful MEs using phenotypic models.

## 652 **8 Conclusion**

653 We dissected the sources of soybean seed yield variation using reports from Soybean Cooperative  
654 Tests for maturity groups II and III. We determined that sampled sets of environments can be split  
655 into mega-environments according to phenotypic, geographic, and meteorological information.  
656 Reasonable estimates of variance components are essential for analyses of data from historical  
657 field trials. Furthermore, it was possible to monitor trends in variance components involving  
658 genotypes in terms of parametric probability distributions. Historical field trials also evaluate  
659 traits like seed quality and size, iron deficiency chlorosis, green stem, seed oil, and protein content.  
660 The approach presented herein can be applied to variation of multiple economically important  
661 quantitative traits. Finally, in addition to the practical and theoretical results applied to soybean  
662 genetic improvement, the analysis performed in this study may be applied to quantitative traits  
663 evaluated in any crop using multi-environment trials.

## 664 **9 Declaration of competing interest**

665 The authors state there is no conflict of interest.

## 666 **10 Author contributions**

667 MDK and WDB conceived the research; MDK performed the statistical analyses and wrote the  
668 first drafts of the manuscript; KOGD provided insights into the methodology and helped in the  
669 interpretation of the results; AKS provided interpretation of the results and guidance in scientific  
670 writing; and WDB and AKS were responsible for acquiring funding to support the research. All  
671 authors critically revised drafts of the manuscript and approved the final version.

## 672 **11 Acknowledgments**

673 Our sincere thanks to Dr. Aaron Lorenz' group for providing a large portion of the phenotypic  
674 data; Dr. Rex Nelson for providing individual plot data from trials conducted in years 2018 and  
675 2019; Dr. Jim Specht for valuable insights on environmental factors that influence soybean growth  
676 and development; Dr. Alencar Xavier for careful reading and suggestions on the early draft of the  
677 manuscript; and the Iowa State University Research IT team for providing efficient computational  
678 power. Most importantly the authors appreciate the long term commitments of all collaborators  
679 (breeders, staff, students, farmers, etc.) that have worked on conducting the cooperative Soy-  
680 bean trials every year since 1983. Funding for this research was provided by the Department of  
681 Agronomy - Iowa State University, the North Central Soybean Research Program, an NSF grant  
682 (1830478), Baker Center for Plant Breeding, and USDA CRIS Project IOW04714.



## 683 12 Tables and Figures

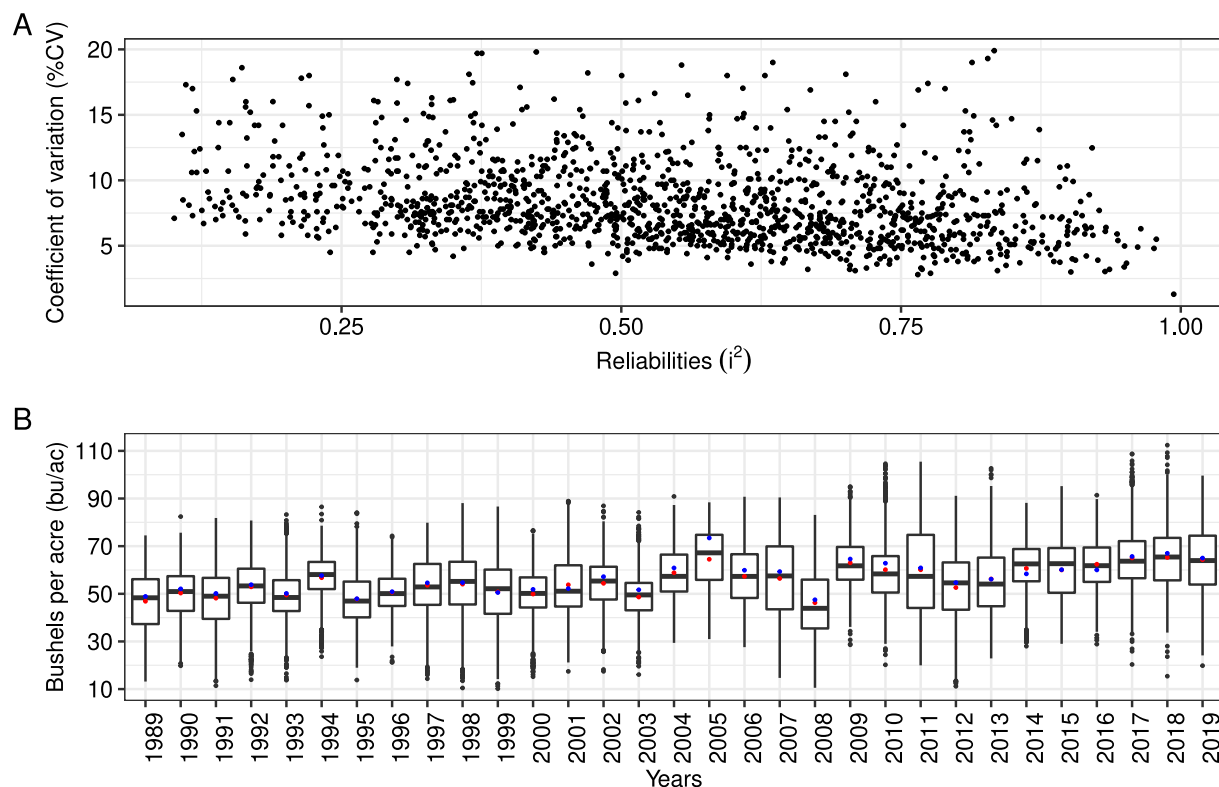

Figure 1: Estimates of reliabilities ( $i^2$ ) and coefficient of variation (%CV) for 1423 soybean field trials conducted from 1989 to 2019 (A), and boxplots of empirical best linear unbiased estimates (eBLUEs) of seed yield plotted by year (B) from 1989 to 2019. Red dots in B depict the average yield of experimental cultivars excluding checks, whereas blue dots depict the average yield of the check varieties.

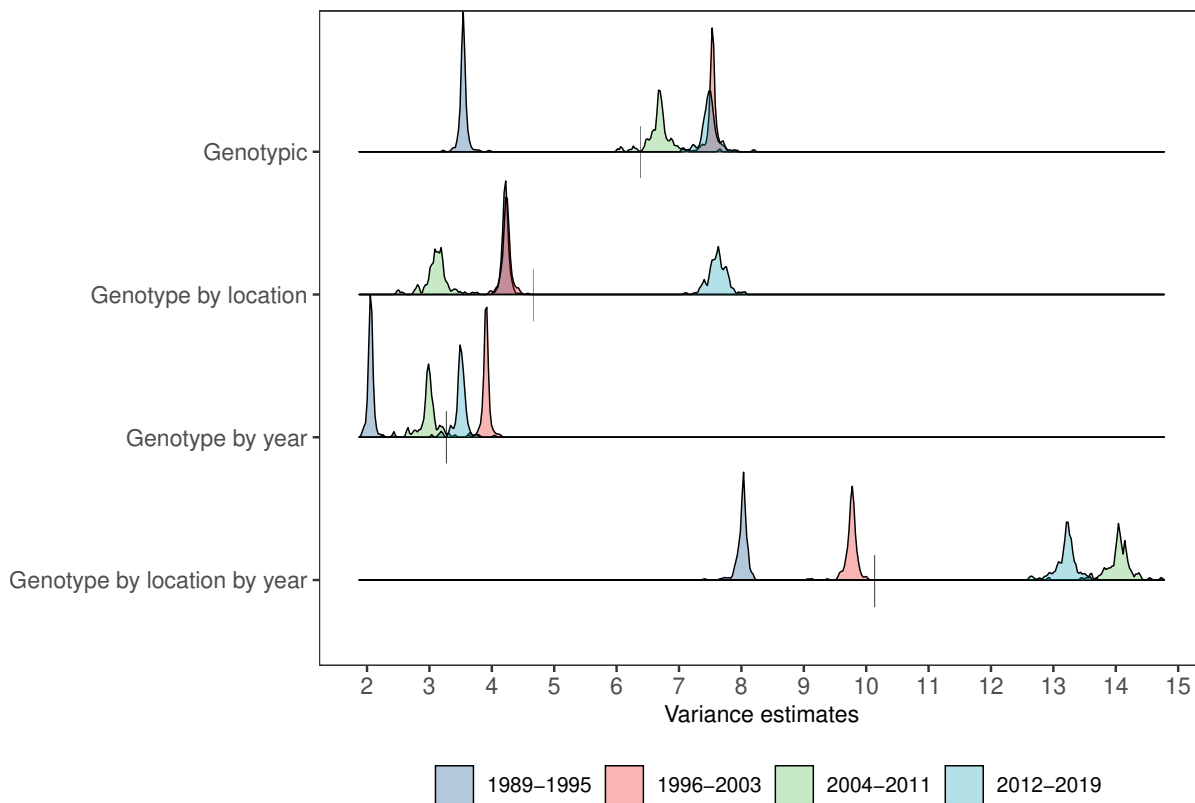

Figure 2: Empirical distributions of estimated variance components consisting of genotypic, genotype by location, genotype by year, and genotype by location by year variances for groups of years 1989-1995, 1996-2003, 2004-2011, and 2012-2019. Empirical estimates were obtained using a jack-knife leave-one-location out method. Vertical bars on the x-axis represent point estimates across all years.

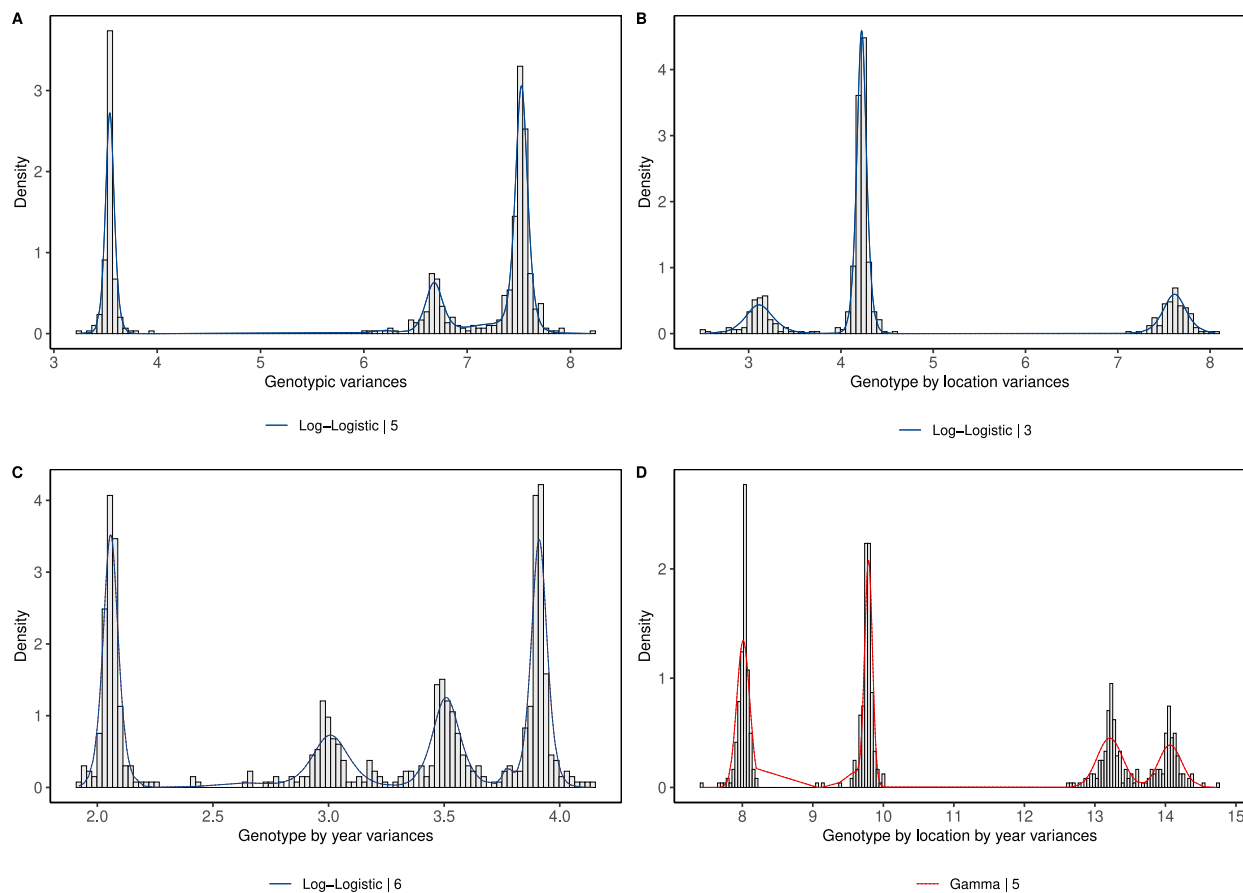

Figure 3: Empirical distributions and probability density function (PDF) of variance components for genotypic (A), genotype by location (B), genotype by year (C), and genotype by location by year (D). Empirical estimates were obtained using a jackknife leave-one-location out method. The best-fit models for PDF's are presented with different colors, and include the name of the distribution and its mixture number.

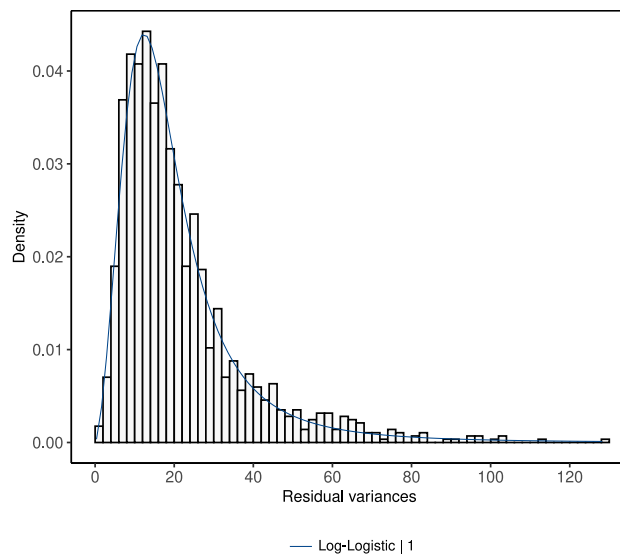

Figure 4: Empirical distribution and probability density function (PDF) for the unimodal Log-Logistic model of residual estimates from individual trials.

Table 1: Models and criteria used to evaluate the models for purposes of clustering locations into groups representing the most likely target population of environments. The best-fit model (M3-18) is highlighted in bold.

| Model              | Covariance structure <sup>a</sup>                    |                                                      |                              | Evaluation criteria |             |             |
|--------------------|------------------------------------------------------|------------------------------------------------------|------------------------------|---------------------|-------------|-------------|
|                    | $\Sigma_{gl}$                                        | $\Sigma_{gy}$                                        | $\Sigma_{\epsilon}$          | AIC                 | % Var(GL)   | % Var(GY)   |
| M3-1               | $\mathbf{I} \otimes \mathbf{I}$                      | $\mathbf{I} \otimes \mathbf{I}$                      | $\Sigma_2$                   | 175294              | -           | -           |
| M3-2               | $\mathbf{D} \otimes \mathbf{I}$                      | $\mathbf{I} \otimes \mathbf{I}$                      | $\Sigma_2$                   | 174256              | -           | -           |
| M3-3               | $\mathbf{I} \otimes \mathbf{I}$                      | $\mathbf{D} \otimes \mathbf{I}$                      | $\Sigma_2$                   | 174964              | -           | -           |
| M3-4               | $\mathbf{D} \otimes \mathbf{I}$                      | $\mathbf{D} \otimes \mathbf{I}$                      | $\Sigma_2$                   | 173951              | -           | -           |
| M3-5               | $\mathbf{FA}_1 \otimes \mathbf{I}$                   | $\mathbf{D} \otimes \mathbf{I}$                      | $\Sigma_2$                   | 172845              | 48.5        | -           |
| M3-6               | $\mathbf{FA}_2 \otimes \mathbf{I}$                   | $\mathbf{D} \otimes \mathbf{I}$                      | $\Sigma_2$                   | 172560              | 67.3        | -           |
| M3-7               | $\mathbf{FA}_3 \otimes \mathbf{I}$                   | $\mathbf{D} \otimes \mathbf{I}$                      | $\Sigma_2$                   | 172359              | 78.2        | -           |
| M3-8               | $\mathbf{FA}_4 \otimes \mathbf{I}$                   | $\mathbf{D} \otimes \mathbf{I}$                      | $\Sigma_2$                   | 172303              | 87.6        | -           |
| M3-9               | $\mathbf{FA}_1 \otimes \mathbf{I}$                   | $\mathbf{FA}_1 \otimes \mathbf{I}$                   | $\Sigma_2$                   | 172754              | 48.0        | 63.4        |
| M3-10              | $\mathbf{FA}_2 \otimes \mathbf{I}$                   | $\mathbf{FA}_2 \otimes \mathbf{I}$                   | $\Sigma_2$                   | 172472              | 66.2        | 82.5        |
| M3-11              | $\mathbf{FA}_3 \otimes \mathbf{I}$                   | $\mathbf{FA}_3 \otimes \mathbf{I}$                   | $\Sigma_2$                   | 172288              | 77.0        | 96.4        |
| M3-12 <sup>b</sup> | $\mathbf{FA}_4 \otimes \mathbf{I}$                   | $\mathbf{FA}_4 \otimes \mathbf{I}$                   | $\Sigma_2$                   | -                   | -           | -           |
| M3-13              | $\mathbf{FA}_2 \otimes \mathbf{I}$                   | $\mathbf{FA}_1 \otimes \mathbf{I}$                   | $\Sigma_2$                   | 172494              | 66.4        | 61.0        |
| M3-14              | $\mathbf{FA}_3 \otimes \mathbf{I}$                   | $\mathbf{FA}_1 \otimes \mathbf{I}$                   | $\Sigma_2$                   | 172296              | 77.6        | 61.0        |
| M3-15              | $\mathbf{FA}_3 \otimes \mathbf{I}$                   | $\mathbf{FA}_2 \otimes \mathbf{I}$                   | $\Sigma_2$                   | 172276              | 77.5        | 82.9        |
| M3-16              | $\mathbf{FA}_4 \otimes \mathbf{I}$                   | $\mathbf{FA}_2 \otimes \mathbf{I}$                   | $\Sigma_2$                   | 172205              | 84.7        | 86.3        |
| M3-17              | $\mathbf{FA}_4 \otimes \mathbf{I}$                   | $\mathbf{FA}_3 \otimes \mathbf{I}$                   | $\Sigma_2$                   | 172234              | 87.3        | 96.7        |
| <b>M3-18</b>       | <b><math>\mathbf{FA}_5 \otimes \mathbf{I}</math></b> | <b><math>\mathbf{FA}_2 \otimes \mathbf{I}</math></b> | <b><math>\Sigma_2</math></b> | <b>171990</b>       | <b>90.2</b> | <b>87.2</b> |
| M3-19              | $\mathbf{FA}_5 \otimes \mathbf{I}$                   | $\mathbf{FA}_3 \otimes \mathbf{I}$                   | $\Sigma_2$                   | 172196              | 88.9        | 96.9        |
| M3-20 <sup>b</sup> | $\mathbf{FA}_6 \otimes \mathbf{I}$                   | $\mathbf{FA}_2 \otimes \mathbf{I}$                   | $\Sigma_2$                   | -                   | -           | -           |

<sup>a</sup> The evaluated variance-covariance structures were identity (**I**), diagonal (**D**), and factor analytic (**FA<sub>k</sub>**) from order  $k = 1, \dots, 6$ .  $\Sigma_2$  is the residual variance matrix assumed to be known from single trial and location analysis.

<sup>b</sup> Singularity in the Average Information matrix.



Table 2: Point estimates and standard error of variance components for seed yield computed from Soybean Cooperative Tests (1989-2019) using Model 3-1 (baseline) and six clustering methods for clustering locations into mega-environments using Model 5.

| Variance components <sup>a</sup> | Model 3-1                | Clustering criteria <sup>b</sup> |             |             |             |             |             |
|----------------------------------|--------------------------|----------------------------------|-------------|-------------|-------------|-------------|-------------|
|                                  |                          | PHE                              | SoilE       | Lat2        | Lat3        | WA          | WW          |
| $\hat{\sigma}_G^2$               | 6.3 (0.3)                | 4.5 (0.4)                        | 5.0 (0.5)   | 4.8 (0.4)   | 5.6 (0.4)   | 5.7 (0.4)   | 6.3 (0.4)   |
| $\hat{\sigma}_L^2$               | 58.9 (13.1) <sup>c</sup> | 56.4 (12.6)                      | 58.6 (13.1) | 59.5 (13.2) | 48.9 (11.4) | 59.1 (13.2) | 60.5 (13.5) |
| $\hat{\sigma}_Y^2$               | 15.3 (5.4)               | 13.4 (6.6)                       | 10.6 (7.2)  | 11.5 (6.3)  | 15.1 (6.1)  | 16.5 (6.5)  | 15.0 (6.4)  |
| $\hat{\sigma}_{LY}^2$            | 81.4 (5.2)               | 74.6 (5.0)                       | 79.9 (5.2)  | 76.5 (5.0)  | 77.7 (5.2)  | 80.0 (5.1)  | 79.9 (5.2)  |
| $\hat{\sigma}_{GL}^2$            | 4.8 (0.3)                | -                                | -           | -           | -           | -           | -           |
| $\hat{\sigma}_{GY}^2$            | 3.2 (0.3)                | 2.8 (0.3)                        | 2.9 (0.4)   | 3.2 (0.3)   | 3.1 (0.3)   | 2.8 (0.3)   | 3.0 (0.3)   |
| $\hat{\sigma}_{GLY}^2$           | 10.1 (0.3)               | -                                | -           | -           | -           | -           | -           |
| $\hat{\sigma}_{RY}^2$            | -                        | 12.2 (5.7)                       | 7.6 (6.5)   | 10.2 (5.2)  | 5.9 (3.9)   | 2.8 (3.7)   | 3.6 (4.1)   |
| $\hat{\sigma}_{GR}^2$            | -                        | 4.1 (0.3)                        | 2.9 (0.4)   | 2.5 (0.3)   | 1.5 (0.2)   | 1.1 (0.3)   | 0.0 (0.0)   |
| $\hat{\sigma}_{GL(R)}^2$         | -                        | 2.5 (0.3)                        | 4.6 (0.3)   | 3.6 (0.3)   | 3.8 (0.3)   | 4.4 (0.3)   | 4.8 (0.3)   |
| $\hat{\sigma}_{GRY}^2$           | -                        | 0.9 (0.2)                        | 0.5 (0.3)   | 0.1 (0.2)   | 0.1 (0.2)   | 0.7 (0.3)   | 0.5 (0.2)   |
| $\hat{\sigma}_{GL(R)Y}^2$        | -                        | 9.7 (0.3)                        | 9.9 (0.3)   | 10.3 (0.3)  | 10.2 (0.3)  | 9.9 (0.3)   | 9.9 (0.3)   |
| Clusters                         | -                        | 3                                | 2           | 2           | 3           | 2           | 2           |

<sup>a</sup> Genotypic ( $\hat{\sigma}_G^2$ ), location ( $\hat{\sigma}_L^2$ ), year ( $\hat{\sigma}_Y^2$ ), location by year ( $\hat{\sigma}_{LY}^2$ ), genotype by location ( $\hat{\sigma}_{GL}^2$ ), genotype by year ( $\hat{\sigma}_{GY}^2$ ), genotype by location by year ( $\hat{\sigma}_{GLY}^2$ ), cluster by year ( $\hat{\sigma}_{RY}^2$ ), genotype by cluster ( $\hat{\sigma}_{GR}^2$ ), genotype by location nested in cluster ( $\hat{\sigma}_{GL(R)}^2$ ), genotype by cluster by year ( $\hat{\sigma}_{GRY}^2$ ), and genotype by location nested in cluster by year ( $\hat{\sigma}_{GL(R)Y}^2$ ).

<sup>b</sup> Phenotypic (PHE), soil and elevation (SoilE), latitude split into two groups (Lat2), latitude split into three groups (Lat3), weather from means across years (WA), and weather from means within years (WW).

<sup>c</sup> Locations were modelled as a random effect in model 3-1 (Table 1).

Table 3: Maximum Likelihood estimates of parameters for the best-fit univariate and multivariate probability distributions for empirical distributions obtained using jackknife resampling. Estimates of residual variance ( $\sigma_\epsilon^2$ ) were obtained from trials conducted from 1989 to 2019.

| Variance <sup>a</sup> | Distribution | Number of distributions | Parameters <sup>b</sup> |                  |                 |
|-----------------------|--------------|-------------------------|-------------------------|------------------|-----------------|
|                       |              |                         | $\hat{w}_i$             | $\hat{\alpha}_i$ | $\hat{\beta}_i$ |
| $\sigma_G^2$          | Log-Logistic | 5                       | 0.30                    | 125.98           | 3.54            |
|                       |              |                         | 0.14                    | 119.87           | 6.68            |
|                       |              |                         | 0.08                    | 44.03            | 7.23            |
|                       |              |                         | 0.01                    | 88.03            | 6.18            |
|                       |              |                         | 0.47                    | 192.69           | 7.53            |
| $\sigma_{GL}^2$       | Log-Logistic | 3                       | 0.63                    | 122.27           | 4.23            |
|                       |              |                         | 0.17                    | 32.00            | 3.12            |
|                       |              |                         | 0.20                    | 92.56            | 7.62            |
| $\sigma_{GY}^2$       | Log-Logistic | 6                       | 0.02                    | 258.41           | 3.77            |
|                       |              |                         | 0.31                    | 172.61           | 3.91            |
|                       |              |                         | 0.20                    | 89.05            | 3.51            |
|                       |              |                         | 0.30                    | 94.97            | 2.06            |
|                       |              |                         | 0.02                    | 32.81            | 2.64            |
| $\sigma_{GLY}^2$      | Gamma        | 5                       | 0.15                    | 57.79            | 3.01            |
|                       |              |                         | 0.05                    | 4078.04          | 0.0024          |
|                       |              |                         | 0.31                    | 7755.00          | 0.0011          |
|                       |              |                         | 0.20                    | 5306.62          | 0.0025          |
|                       |              |                         | 0.28                    | 31922.50         | 0.0003          |
| $\sigma_\epsilon^2$   | Log-Logistic | 1                       | 0.16                    | 7301.02          | 0.0020          |
|                       |              |                         | 1                       | 2.56             | 17.03           |

<sup>695</sup> <sup>a</sup> Genotypic ( $\sigma_G^2$ ), genotype by location ( $\sigma_{GL}^2$ ), genotype by year ( $\sigma_{GY}^2$ ), and genotype by location by year ( $\sigma_{GLY}^2$ )  
<sup>696</sup> variance components.

<sup>697</sup> <sup>b</sup> Estimates of weight parameters ( $w_i$ ) sums to one, and both Gamma and Log-Logistic distributions include a shape  
<sup>698</sup> ( $\alpha_i$ ) and scale ( $\beta_i$ ) parameter.

Table 4: The ratio of correlated responses from selection across all environments relative to direct responses to selection within mega-environments (CR/DR) for each clustering type.  $\rho_g$  is the correlation between estimated genotypic effects in the non-clustered and clustered sets of environments,  $i_L^2$  and  $i_{SR}^2$  are the reliabilities of genotype means in the non-clustered and clustered sets of environments, respectively.

| Clustering type <sup>a</sup> | Number of |              | Estimates of   |               |                  |                   |
|------------------------------|-----------|--------------|----------------|---------------|------------------|-------------------|
|                              | Clusters  | Locations    | $\hat{\rho}_g$ | $\hat{i}_L^2$ | $\hat{i}_{SR}^2$ | $\widehat{CR/DR}$ |
| PHE                          | 3         | 36 / 7 / 20  | 0.72           | 0.38          | 0.51             | 0.62              |
| SoilE                        | 2         | 9 / 54       | 0.88           | 0.39          | 0.45             | 0.81              |
| Lat2                         | 2         | 35 / 28      | 0.81           | 0.39          | 0.48             | 0.73              |
| Lat3                         | 3         | 16 / 36 / 11 | 0.89           | 0.44          | 0.44             | 0.89              |
| WA                           | 2         | 25 / 38      | 0.92           | 0.45          | 0.45             | 0.92              |
| WW                           | 2         | 19 / 44      | 1.00           | 0.51          | 0.43             | 1.08              |
|                              | 2         | -            | 0.99           | 0.52          | 0.44             | 1.07              |
| At random                    | 3         | -            | 0.99           | 0.51          | 0.39             | 1.14              |
|                              | 4         | -            | 0.99           | 0.51          | 0.36             | 1.18              |

<sup>699</sup> <sup>a</sup> Phenotypic (PHE), soil and elevation (SoilE), latitude split into two groups (Lat2), latitude split into three groups  
<sup>700</sup> (Lat3), weather from means across years (WA), and weather from means within years (WW).

<sup>701</sup>

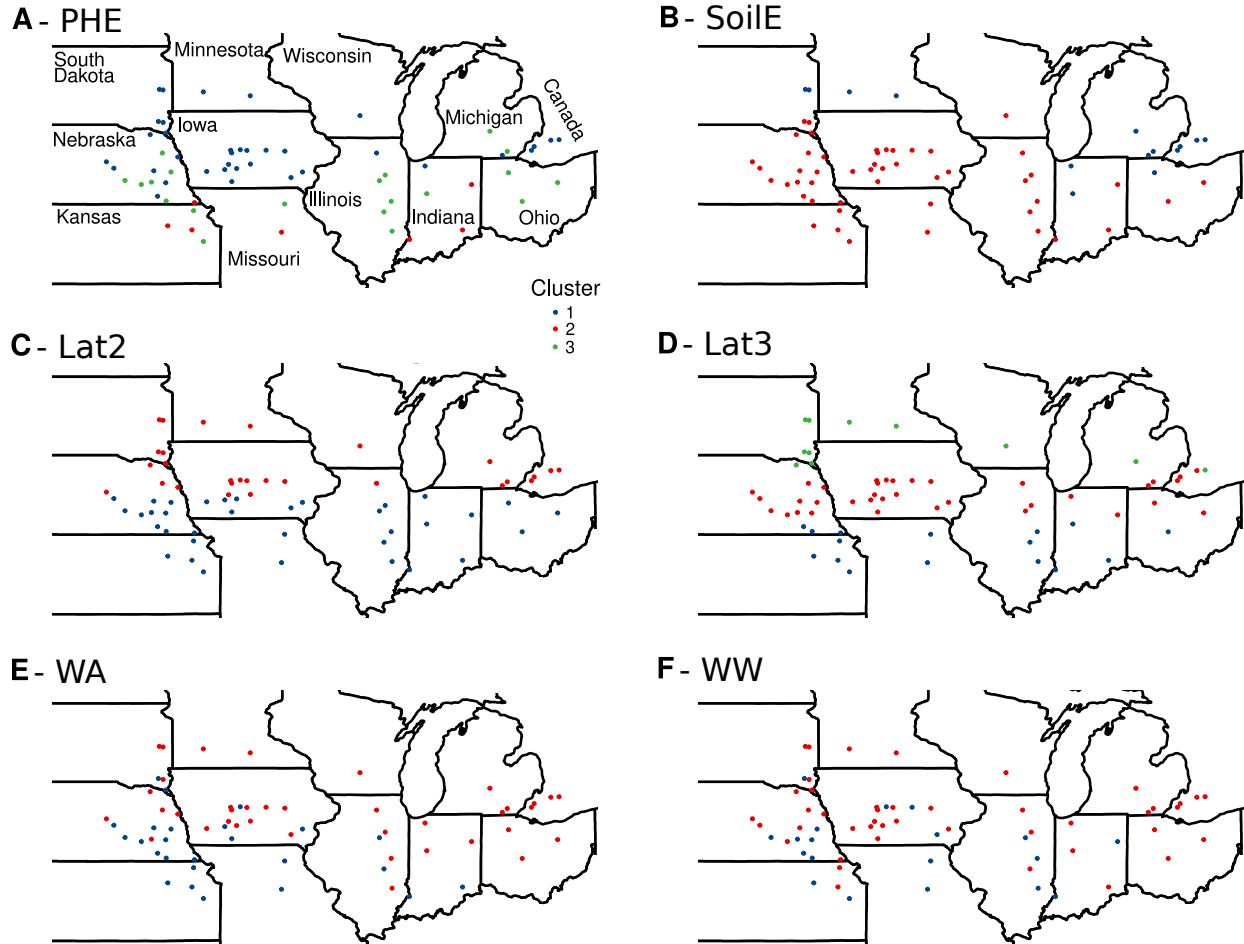

Figure 5: Geographic visualization of the target population of environments divided according to phenotypic (A), soil + elevation (B), latitude split into two groups (C), latitude split into three groups (D), weather across years (E), and weather within years (F) clustering types. In (A), the states' names are provided for geographic orientation.

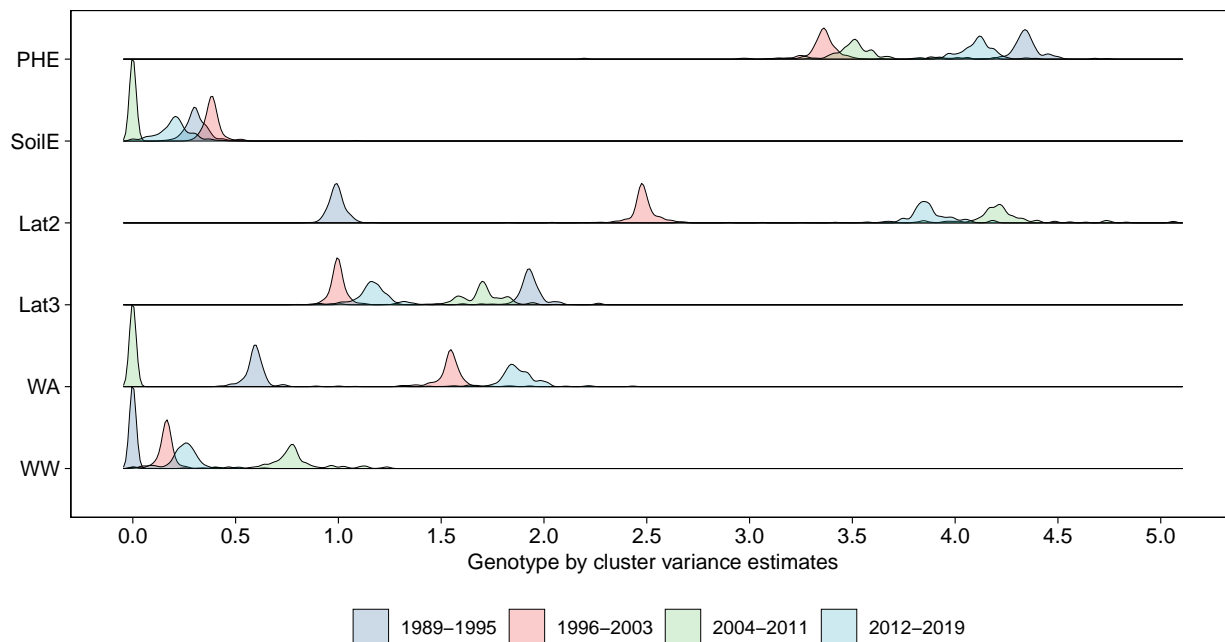

Figure 6: Jackknife estimates of genotype by cluster variances for the groups of years 1989-1995, 1996-2003, 2004-2011, and 2012-2019, for phenotypic (PHE), soil + elevation (SoilE), latitude split into two groups (Lat2), latitude split into three groups (Lat3), weather across years (WA), and weather within years (WW) clustering types.

## References

- 702
- 703 AGUATE, F., J. CROSSA, and M. BALZARINI, 2019 Effect of missing values on variance component estimates in multi-  
704 environment trials. *Crop Science* **59**: 508–517.
- 705 AKAIKE, H., 1974 A New Look at the Statistical Model Identification. *IEEE Transactions on Automatic Control* **19**:  
706 716–723.
- 707 ANNICCHIARICO, P., 2021 Breeding gain from exploitation of regional adaptation: An alfalfa case study. *Crop Science*  
708 **61**: 2254–2271.
- 709 ARIEF, V. N., I. H. DELACY, J. CROSSA, T. PAYNE, R. SINGH, H. J. BRAUN, T. TIAN, K. E. BASFORD, and M. J. DIETERS,  
710 2015 Evaluating Testing Strategies for Plant Breeding Field Trials: Redesigning a CIMMYT International Wheat  
711 Nursery. *Crop Science* **55**: 164–177.
- 712 ATLIN, G. N., R. J. BAKER, K. B. McRAE, and X. LU, 2000a Selection response in subdivided target regions. *Crop Science*  
713 **40**: 7–13.
- 714 ATLIN, G. N., K. B. McRAE, and X. LU, 2000b Genotype x region interaction for two-row barley yield in Canada. *Crop*  
715 *Science* **40**: 1–6.
- 716 BERNARDO, R., 2020 *Breeding for Quantitative Traits in Plants*. Stemma Press, Woodbury, MN, third edition.
- 717 BUNTARAN, H., J. FORKMAN, and H. P. PIEPHO, 2021 Projecting results of zoned multi-environment trials to new  
718 locations using environmental covariates with random coefficient models: accuracy and precision. *Theoretical*  
719 *and Applied Genetics* **134**: 1513–1530.
- 720 BUNTARAN, H., H. P. PIEPHO, J. HAGMAN, and J. FORKMAN, 2019 A cross-validation of statistical models for zoned-  
721 based prediction in cultivar testing. *Crop Science* **59**: 1544–1553.
- 722 BURGUEÑO, J., J. CROSSA, P. L. CORNELIUS, and R. C. YANG, 2008 Using factor analytic models for joining environments  
723 and genotypes without crossover genotype x environment interaction. *Crop Science* **48**: 1291–1305.
- 724 BUSTOS-KORTS, D., 2017 *Modelling of genotype by environment interaction and prediction of complex traits across mul-*  
725 *tiiple environments as a synthesis of crop growth modelling, genetics and statistics*. Ph.D. thesis, Wageningen Uni-  
726 versity.
- 727 BUSTOS-KORTS, D., M. P. BOER, K. CHENU, B. ZHENG, S. CHAPMAN, and F. A. VAN EEUWIJK, 2021 Genotype-specific  
728 P-spline response surfaces assist interpretation of regional wheat adaptation to climate change. *In Silico Plants* **3**:  
729 1–23.
- 730 BUTLER, D. G., B. R. CULLIS, A. R. GILMOUR, B. G. GOGEL, and R. THOMPSON, 2017 *ASReml-R Reference Manual*  
731 *Version 4*.
- 732 CIMMYT, 1989 *Toward the 21st century*. CIMMYT, Mexico, D.F.
- 733 COMSTOCK, R. E. and H. MOLL, 1962 Genotype-environment interactions. In *Statistical Genetics and Plant Breeding*,  
734 pp. 164–196, National Academy of Sciences-National Research Council, Washington, D.C.
- 735 COOPER, M. and I. H. DELACY, 1994 Relationships among analytical methods used to study genotypic variation and  
736 genotype-by-environment interaction in plant breeding multi-environment experiments. *Theoretical and Applied*  
737 *Genetics* **88**: 561–572.
- 738 COOPER, M., C. D. MESSINA, D. PODLICH, L. R. TOTIR, A. BAUMGARTEN, N. J. HAUSMANN, D. WRIGHT, and G. GRAHAM,  
739 2014 Predicting the future of plant breeding: complementing empirical evaluation with genetic prediction. *Crop*  
740 *and Pasture Science* **65**: 311.



- 741 COSTA-NETO, G. and R. FRITSCHÉ-NETO, 2021 Enviromics: bridging different sources of data, building one framework.  
742 Crop Breeding and Applied Biotechnology **21**: 393521–393533.
- 743 COSTA-NETO, G., G. GALLI, H. F. CARVALHO, J. CROSSA, and R. FRITSCHÉ-NETO, 2021 EnvRtype: a software to interplay  
744 enviromics and quantitative genomics in agriculture. G3 (Bethesda, Md.) **11**.
- 745 CRESPO-HERRERA, L. A., J. CROSSA, J. HUERTA-ESPINO, S. MONDAL, G. VELU, P. JULIANA, M. VARGAS, P. PÉREZ-  
746 RODRÍGUEZ, A. K. JOSHI, H. J. BRAUN, and R. P. SINGH, 2021 Target Population of Environments for Wheat Breeding  
747 in India: Definition, Prediction and Genetic Gains. Frontiers in Plant Science **12**: 1–15.
- 748 CULLIS, B. R., A. SMITH, C. HUNT, and A. GILMOUR, 2000 An examination of the efficiency of Australian crop variety  
749 evaluation programmes. Journal of Agricultural Science **135**: 213–222.
- 750 DA SILVA, K. J., P. E. TEODORO, M. J. DA SILVA, L. P. R. TEODORO, M. J. CARDOSO, V. D. P. C. GODINHO, J. H. MOTA, G. A.  
751 SIMON, F. D. TARDIN, A. R. DA SILVA, F. L. GUEDES, and C. B. DE MENEZES, 2021 Identification of mega-environments  
752 for grain sorghum in Brazil using GGE biplot methodology. Agronomy Journal **113**: 1–12.
- 753 DEMPSTER, A. P., N. M. LAIRD, and D. B. RUBIN, 1977 Maximum Likelihood from Incomplete Data Via the EM Algo-  
754 rithm. Journal of the Royal Statistical Society: Series B (Methodological) **39**: 1–38.
- 755 DIAS, K. O., H. P. PIEPHO, L. J. GUIMARÃES, P. E. GUIMARÃES, S. N. PARENTONI, M. O. PINTO, R. W. NODA, J. V.  
756 MAGALHÃES, C. T. GUIMARÃES, A. A. GARCIA, and M. M. PASTINA, 2020 Novel strategies for genomic prediction  
757 of untested single-cross maize hybrids using unbalanced historical data. Theoretical and Applied Genetics **133**:  
758 443–455.
- 759 FALCONER, D. S., 1952 The Problem of Environment and Selection. The American Naturalist **86**: 293–298.
- 760 FRENHAM, A., B. CULLIS, and A. VERBYLA, 1997 Genotype by Environment Variance Heterogeneity in a Two-Stage  
761 Analysis. Biometrics **53**: 1373–1383.
- 762 FRIESEN, L. F., A. L. BRÚLÉ-BABEL, G. H. CROW, and P. A. ROTHENBURGER, 2016 Mixed model and stability analysis  
763 of spring wheat genotype yield evaluation data from Manitoba, Canada. Canadian Journal of Plant Science **96**:  
764 305–320.
- 765 GAUCH, H. and R. ZOBEL, 1997 Identifying mega-environments and targeting genotypes. Crop Science **37**: 311–326.
- 766 GEORGE, N. and M. LUNDY, 2019 Quantifying genotype × environment effects in long-term common wheat yield  
767 trials from an agroecologically diverse production region. Crop Science **59**: 1960–1972.
- 768 HALDANE, J., 1947 The interaction of nature and nurture. Annals of Human Genetics **17**: 197–205.
- 769 HARTUNG, J. and H. PIEPHO, 2021 Effect of missing values in multi-environmental trials on variance component  
770 estimates. Crop Science pp. 1–11.
- 771 HENDERSON, C. R., 1950 Estimation of genetic parameters. Annals of Mathematical Statistics **21**: 309–310.
- 772 HENDERSON, C. R., 1963 Selection index and expected genetic advance. In *Statistical genetics and plant breeding*, p.  
773 623, National Academy of Genetic Advance - National Research Council, Washington DC.
- 774 HIJMANS, R. J., 2021 raster: Geographic Data Analysis and Modeling.
- 775 HOLLISTER, J., T. SHAH, A. L. ROBITAILLE, M. W. BECK, and M. JOHNSON, 2021 elevatr: Access Elevation Data from  
776 Various APIs.
- 777 HOLZWORTH, D. P., N. I. HUTH, P. G. DEVOIL, E. J. ZURCHER, N. I. HERRMANN, G. MCLEAN, K. CHENU, E. J. VAN  
778 OOSTEROM, V. SNOW, C. MURPHY, A. D. MOORE, H. BROWN, J. P. WHISH, S. VERRALL, J. FAINGES, L. W. BELL, A. S.  
779 PEAKE, P. L. POULTON, Z. HOCHMAN, and P. J. THORBURN, 2014 APSIM – Evolution towards a new generation of  
780 agricultural systems simulation. Environmental modelling & software : with environment data news. **62**: 327–350.

- 781 JACKSON, S. D., 2009 Plant responses to photoperiod. *New Phytologist* **181**: 517–531.
- 782 JOHANNSEN, W., 1911 The genotype conception of heredity. *The American Naturalist* **45**: 129–159.
- 783 KANG, M., 2020 Genotype-environment interaction and stability analyses: an update. In *Quantitative genetics, ge-*  
784 *nomics and plant breeding*, edited by M. Kang, chapter 9, pp. 140–161, CABI, second edition.
- 785 KASSAMBARA, A. and F. MUNDT, 2020 factoextra: Extract and Visualize the Results of Multivariate Data Analyses.
- 786 KLEINKNECHT, K., J. MÖHRING, F. LAIDIG, U. MEYER, and H. P. PIEPHO, 2016 A simulation-based approach for evalu-  
787 ating the efficiency of multi-environment trial designs. *Crop Science* **56**: 2237–2250.
- 788 KRISHNAMURTHY, S. L., P. C. SHARMA, D. K. SHARMA, K. T. RAVIKIRAN, Y. P. SINGH, V. K. MISHRA, D. BURMAN, B. MAJI,  
789 S. MANDAL, S. K. SARANGI, R. K. GAUTAM, P. K. SINGH, K. K. MANOHARA, B. C. MARANDI, G. PADMAVATHI, P. B.  
790 VANVE, K. D. PATIL, S. THIRUMENI, O. P. VERMA, A. H. KHAN, S. TIWARI, S. GEETHA, M. SHAKILA, R. GILL, V. K.  
791 YADAV, S. K. ROY, M. PRAKASH, J. BONIFACIO, A. ISMAIL, G. B. GREGORIO, and R. K. SINGH, 2017 Identification of  
792 mega-environments and rice genotypes for general and specific adaptation to saline and alkaline stresses in India.  
793 *Scientific Reports* **7**: 1–14.
- 794 LAIDIG, F., T. DROBEK, and U. MEYER, 2008 Genotypic and environmental variability of yield for cultivars from 30  
795 different crops in German official variety trials. *Plant Breeding* **127**: 541–547.
- 796 LAIDIG, F., H. P. PIEPHO, D. RENTEL, T. DROBEK, U. MEYER, and A. HUESKEN, 2017a Breeding progress, environmental  
797 variation and correlation of winter wheat yield and quality traits in German official variety trials and on-farm  
798 during 1983–2014. *Theoretical and Applied Genetics* **130**: 223–245.
- 799 LAIDIG, F., H. P. PIEPHO, D. RENTEL, T. DROBEK, U. MEYER, and A. HUESKEN, 2017b Breeding progress, variation, and  
800 correlation of grain and quality traits in winter rye hybrid and population varieties and national on-farm progress  
801 in Germany over 26 years. *Theoretical and Applied Genetics* **130**: 981–998.
- 802 LI, X. X., T. GUO, Q. MU, X. X. LI, and J. YU, 2018 Genomic and environmental determinants and their interplay  
803 underlying phenotypic plasticity. *Proceedings of the National Academy of Sciences of the United States of America*  
804 **115**: 6679–6684.
- 805 LITTLE, R. J. A. and D. B. RUBIN, 2020 *Statistical analysis with missing data*. Wiley series in probability and statistics,  
806 John Wiley & Sons, third edition.
- 807 MACKAY, I., H. P. PIEPHO, and A. A. F. GARCIA, 2019 Statistical Methods for Plant Breeding. In *Handbook of Statistical*  
808 *Genomics*, edited by D. Balding, I. Moltke, and J. Marioni, chapter 17, pp. 501–530, John Wiley & Sons Ltd, Hoboken,  
809 NJ, fourth edition.
- 810 MALOSETTI, M., J. M. RIBAUT, and F. A. VAN EEUWIJK, 2013 The statistical analysis of multi-environment data: Mod-  
811 eling genotype-by-environment interaction and its genetic basis. *Frontiers in Physiology* **4**: 1–17.
- 812 MEYER, U., F. LAIDIG, and T. DROBEK, 2011 Optimization of number of trials in official VCU trial series of Germany.  
813 *Biuletyn Oceny Odmian* **33**: 73–82.
- 814 MICROSOFT CORPORATION and S. WESTON, 2020a doParallel: Foreach Parallel Adaptor for the 'parallel' Package.
- 815 MICROSOFT CORPORATION and S. WESTON, 2020b foreach: Provides Foreach Looping Construct.
- 816 MÖHRING, J. and H. P. PIEPHO, 2009 Comparison of weighting in two-stage analysis of plant breeding trials. *Crop*  
817 *Science* **49**: 1977–1988.
- 818 MÖHRING, J., E. WILLIAMS, and H. P. PIEPHO, 2015 Inter-block information: to recover or not to recover it? *Theoretical*  
819 *and Applied Genetics* **128**: 1541–1554.

- 820 MOURTZINIS, S. and S. P. CONLEY, 2017 Delineating soybean maturity groups across the United States. *Agronomy*  
821 *Journal* **109**: 1397–1403.
- 822 OAKEY, H., B. CULLIS, R. THOMPSON, J. COMADRAN, C. HALPIN, and R. WAUGH, 2016 Genomic selection in multi-  
823 environment crop trials. *G3: Genes, Genomes, Genetics* **6**: 1313–1326.
- 824 PATTERSON, H. D. and R. THOMPSON, 1971 Recovery of inter-block information when block sizes are unequal.  
825 *Biometrika* **58**: 545–554.
- 826 PIEPHO, H.-P., 1997 Analyzing genotype-environment data by mixed models with multiplicative terms. *Biometrics*  
827 **53**: 761–766.
- 828 PIEPHO, H. P. and J. MÖHRING, 2005 Best linear unbiased prediction of cultivar effects for subdivided target regions.  
829 *Crop Science* **45**: 1151–1159.
- 830 PIEPHO, H. P. and J. MÖHRING, 2006 Selection in cultivar trials - Is it ignorable? *Crop Science* **46**: 192–201.
- 831 PIEPHO, H. P., J. MÖHRING, T. SCHULZ-STREECK, and J. O. OGUTU, 2012 A stage-wise approach for the analysis of  
832 multi-environment trials. *Biometrical Journal* **54**: 844–860.
- 833 PIEPHO, H. P., M. F. NAZIR, M. QAMAR, A. U. R. RATTU, RIAZ-UD-DIN, M. HUSSAIN, G. AHMAD, FAZAL-E-SUBHAN,  
834 J. AHMAD, ABDULLAH, K. B. LAGHARI, I. A. VISTRO, M. SHARIF KAKAR, M. A. SIAL, and M. IMTIAZ, 2016 Stability  
835 analysis for a countrywide series of wheat trials in Pakistan. *Crop Science* **56**: 2465–2475.
- 836 PIGLIUCCI, M., 2001 *Phenotypic plasticity: Beyond nature and nurture*. The Johns Hopkins University Press, Baltimore,  
837 MD.
- 838 R CORE TEAM, 2021 R: A Language and Environment for Statistical Computing.
- 839 RENCHER, A. C. and G. B. SCHAALJE, 2007 *Linear Models in Statistics*. John Wiley & Sons, Inc., Hoboken, NJ, USA.
- 840 ROTHSCHILD, M., C. HENDERSON, and R. L. QUAAS, 1979 Effects of selection on variances and covariances of simulated  
841 first and second lactations. *Journal of Dairy Science* **62**: 996–1002.
- 842 RUBIN, D., 1976 Inference and missing data. *Biometrika* **63**: 581–592.
- 843 RUTKOSKI, J. E., 2019 Estimation of realized rates of genetic gain and indicators for breeding program assessment.  
844 *Crop Science* **59**: 981–993.
- 845 SCHWARZ, G., 1978 Estimating the dimension of a model. *The Annals of Statistics* **6**: 461–464.
- 846 SETIYONO, T. D., A. WEISS, J. SPECHT, A. M. BASTIDAS, K. G. CASSMAN, and A. DOBERMANN, 2007 Understanding and  
847 modeling the effect of temperature and daylength on soybean phenology under high-yield conditions. *Field Crops*  
848 *Research* **100**: 257–271.
- 849 SINGH, D. P., A. K. SINGH, and A. SINGH, 2021 *Plant Breeding and Cultivar Development*. Academic Press, first edition.
- 850 SMITH, A., B. CULLIS, and A. GILMOUR, 2001a The analysis of crop variety evaluation data in Australia. *Australian*  
851 *and New Zealand Journal of Statistics* **43**: 129–145.
- 852 SMITH, A., B. R. CULLIS, and R. THOMPSON, 2001b Analyzing variety by environment data using multiplicative mixed  
853 models and adjustments for spatial field trend. *Biometrics* **57**: 1138–1147.
- 854 SMITH, A., A. NORMAN, H. KUCHEL, and B. CULLIS, 2021 Plant Variety Selection Using Interaction Classes Derived  
855 From Factor Analytic Linear Mixed Models: Models With Independent Variety Effects. *Frontiers in Plant Science*  
856 **12**.

- 857 SMITH, A. B., A. GANESALINGAM, H. KUCHEL, and B. R. CULLIS, 2015 Factor analytic mixed models for the provision  
858 of grower information from national crop variety testing programs. *Theoretical and Applied Genetics* **128**: 55–72.
- 859 SPARKS, A., 2018 nasapower: NASA-POWER Data from R.
- 860 SPRAGUE, G. and W. FEDERER, 1951 A comparison of variance components in corn yield trials: II. error, year x variety,  
861 location x variety, and variety components. *Agronomy Journal* **43**: 535–541.
- 862 STACKLIES, W., H. REDESTIG, M. SCHOLZ, D. WALTHER, and J. SELBIG, 2007 pcaMethods – a Bioconductor package  
863 providing PCA methods for incomplete data. *Bioinformatics* **23**: 1164–1167.
- 864 STEPHENS, M., 1986 Tests based on edf statistics. In *Goodness-of-fit techniques*, edited by R. D’Agostino and  
865 M. Stephens, pp. 97–194, Marcel Dekker, New York.
- 866 TABERY, J., 2008 R. A. Fisher, Lancelot Hogben, and the origin(s) of genotype-environment interaction. *Journal of the*  
867 *History of Biology* **41**: 717–761.
- 868 TEIMOURI, M., 2021 ForestFit: Statistical Modelling for Plant Size Distributions.
- 869 USDA, 2021 Uniform Soybean Tests, Northern Region.
- 870 WINDHAUSEN, V. S., S. WAGENER, C. MAGOROKOSHO, D. MAKUMBI, B. VIVEK, H. P. PIEPHO, A. E. MELCHINGER, and  
871 G. N. ATLIN, 2012 Strategies to subdivide a target population of environments: Results from the CIMMYT-led  
872 maize hybrid testing programs in Africa. *Crop Science* **52**: 2143–2152.
- 873 WOLD, H., 1966 Estimation of principal components and related models by iterative least squares. In *Multivariate*  
874 *Analysis*, edited by P. R. Krishnajah, pp. 391–420, Academic Press, New York.
- 875 XU, Y., 2016 Envirotyping for deciphering environmental impacts on crop plants. *Theoretical and Applied Genetics*  
876 **129**: 653–673.
- 877 YAN, W., 2016 Analysis and handling of G x E in a practical breeding program. *Crop Science* **56**: 2106–2118.
- 878 YAN, W., J. FRÉGEAU-REID, D. PAGEAU, R. MARTIN, J. MITCHELL-FETCH, M. ETIENNE, J. ROWSELL, P. SCOTT, M. PRICE,  
879 B. DE HAAN, A. CUMMISKEY, J. LAJEUNESSE, J. DURAND, and E. SPARRY, 2010 Identifying essential test locations for  
880 oat breeding in Eastern Canada. *Crop Science* **50**: 504–515.
- 881 YAN, W., L. A. HUNT, Q. SHENG, and Z. SZLAVNICS, 2000 Cultivar Evaluation and Mega-Environment Investigation  
882 Based on the GGE Biplot. *Crop Science* **40**: 597–605.
- 883 YAN, W. and I. RAJCAN, 2002 Biplot Analysis of Test Sites and Trait Relations of Soybean in Ontario. *Crop Science* **42**:  
884 11–20.
- 885 ZDZIARSKI, A. D., L. G. WOYANN, A. S. MILIOLI, R. ZANELLA, L. V. DALLACORTE, M. C. PANHO, and G. BENIN, 2019  
886 Mega-environment identification for soybean (*Glycine max*) breeding and production in Brazilian Midwest region.  
887 *Plant Breeding* **138**: 336–347.

## 888 **13 Appendix**

Table A1: Meteorological variables and selected window across years (WA) with the highest Person correlation ( $\hat{\rho}$ ).

| Window    |     |      | Parameter         |      |                                                     | $\hat{\rho}$ |
|-----------|-----|------|-------------------|------|-----------------------------------------------------|--------------|
| Beginning | End | Size | Name              | Code | Description                                         |              |
| 1         | 8   | 7    | ALLSKY_SFC_LW_DWN | MV1  | Downward thermal infrared (longwave) radiative flux | 0.1719       |
| 9         | 16  | 7    | ALLSKY_SFC_SW_DWN | MV2  | Insolation incident on a horizontal surface         | 0.1956       |
| 9         | 16  | 7    | ETP               | MV3  | Evapotranspiration                                  | 0.2007       |
| 3         | 10  | 7    | FRUE              | MV4  | Effect of temperature on radiation use efficiency   | 0.2021       |
| 3         | 10  | 7    | GDD               | MV5  | Growing degree-days                                 | 0.2012       |
| 9         | 16  | 7    | n                 | MV6  | Duration of sunshine hours                          | 0.1904       |
| 52        | 71  | 19   | PETP              | MV7  | Deficit of evapotranspiration                       | -0.1522      |
| 52        | 72  | 20   | PRECTOT           | MV8  | Rainfall precipitation                              | -0.1267      |
| 3         | 10  | 7    | PTR               | MV9  | Photothermal ratio (GDD / daylight in hours)        | 0.2037       |
| 3         | 10  | 7    | PTT               | MV10 | Photothermal time (GDD $\times$ daylight in hours)  | 0.1981       |
| 1         | 8   | 7    | RH2M              | MV11 | Relative humidity at 2 meters                       | 0.0899       |
| 3         | 10  | 7    | SPV               | MV12 | The slope of saturation vapor pressure curve        | 0.1995       |
| 3         | 11  | 8    | T2M               | MV13 | Daily average temperature at 2 meters               | 0.2052       |
| 3         | 14  | 11   | T2M_MAX           | MV14 | Daily minimum temperature at 2 meters               | 0.1849       |
| 1         | 8   | 7    | T2M_MIN           | MV15 | Daily maximum temperature at 2 meters               | 0.2168       |
| 1         | 8   | 7    | T2M_RANGE         | MV16 | Daily temperature range at 2 meters                 | -0.0943      |
| 1         | 8   | 7    | T2MDEW            | MV17 | Dew point at 2 meters                               | 0.2081       |
| 7         | 14  | 7    | VPD               | MV18 | The deficit of vapor pressure                       | 0.0909       |
| 69        | 77  | 8    | WS2M              | MV19 | Wind speedy at 2 meters                             | -0.1397      |



Table A2: Meteorological variables and selected window within years (WW) with the highest Person correlation ( $\hat{\rho}$ ).

| Window    |     |      |      | Parameter         |      |                                                     | $\hat{\rho}$ |
|-----------|-----|------|------|-------------------|------|-----------------------------------------------------|--------------|
| Beginning | End | Size | Year | Name              | Code | Description                                         |              |
| 40        | 47  | 7    | 2005 | ALLSKY_SFC_LW_DWN | MV1  | Downward thermal infrared (longwave) radiative flux | -0.8768      |
| 46        | 55  | 9    | 1990 | ALLSKY_SFC_SW_DWN | MV2  | Insolation incident on a horizontal surface         | -0.8845      |
| 46        | 55  | 9    | 1990 | ETP               | MV3  | Evapotranspiration                                  | -0.8571      |
| 12        | 44  | 32   | 2005 | FRUE              | MV4  | Effect of temperature on radiation use efficiency   | -0.9041      |
| 12        | 44  | 32   | 2005 | GDD               | MV5  | Growing degree-days                                 | -0.9033      |
| 99        | 124 | 25   | 2014 | n                 | MV6  | Duration of sunshine hours                          | 0.9126       |
| 104       | 120 | 16   | 2005 | PETP              | MV7  | Deficit of evapotranspiration                       | 0.9226       |
| 108       | 120 | 12   | 2005 | PRECTOT           | MV8  | Rainfall precipitation                              | 0.9191       |
| 17        | 44  | 27   | 2005 | PTR               | MV9  | Photothermal ratio (GDD / daylight in hours)        | -0.8853      |
| 11        | 44  | 33   | 2005 | PTT               | MV10 | Photothermal time (GDD $\times$ daylight in hours)  | -0.9176      |
| 31        | 38  | 7    | 2016 | RH2M              | MV11 | Relative humidity at 2 meters                       | -0.8826      |
| 11        | 44  | 33   | 2005 | SPV               | MV12 | The slope of saturation vapor pressure curve        | -0.9004      |
| 12        | 44  | 32   | 2005 | T2M               | MV13 | Daily average temperature at 2 meters               | -0.8906      |
| 12        | 26  | 14   | 2005 | T2M_MAX           | MV14 | Daily minimum temperature at 2 meters               | -0.8831      |
| 108       | 124 | 16   | 2005 | T2M_MIN           | MV15 | Daily maximum temperature at 2 meters               | -0.8533      |
| 112       | 121 | 9    | 2016 | T2M_RANGE         | MV16 | Daily temperature range at 2 meters                 | 0.8354       |
| 5         | 14  | 9    | 2004 | T2MDEW            | MV17 | Dew point at 2 meters                               | 0.7600       |
| 22        | 36  | 14   | 2015 | VPD               | MV18 | The deficit of vapor pressure                       | 0.9191       |
| 66        | 80  | 14   | 1990 | WS2M              | MV19 | Wind speedy at 2 meters                             | -0.8760      |

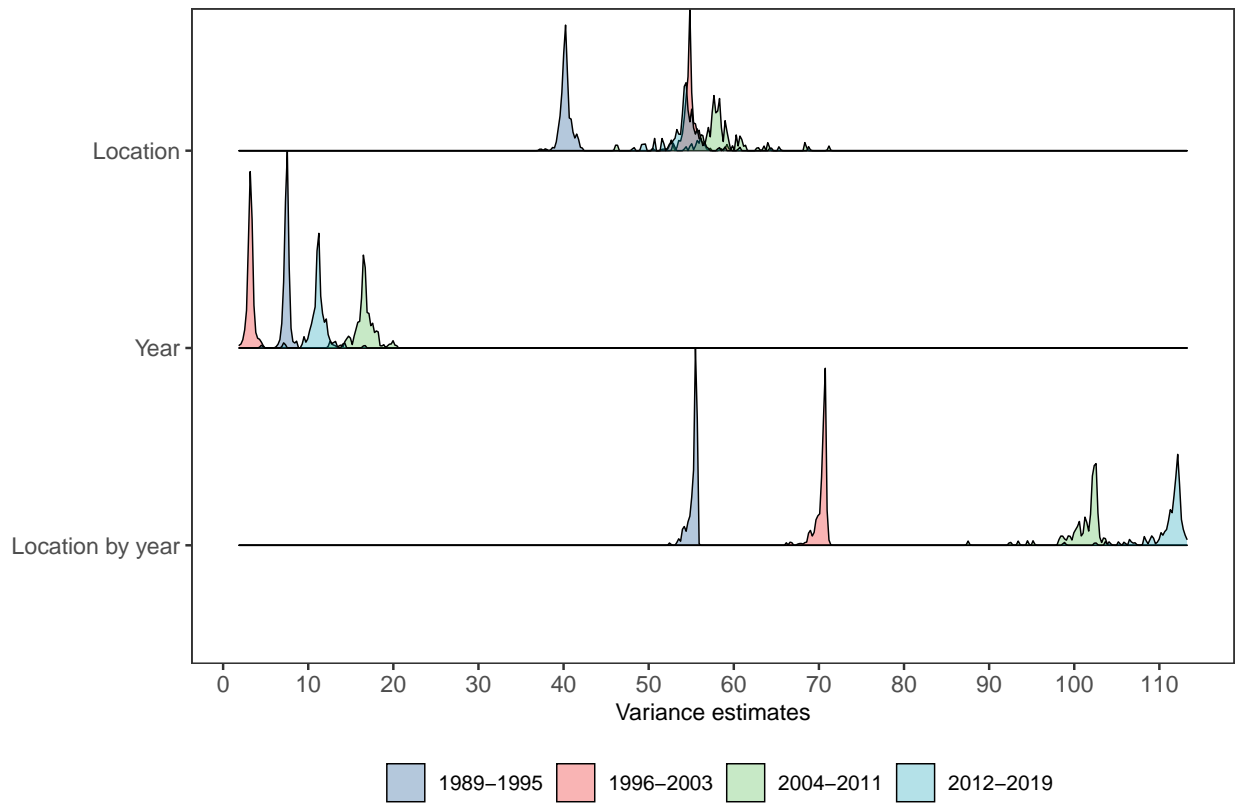

Figure A1: Jackknife estimates of location, year, and location by year variances for the groups of years 1989-1995, 1996-2003, 2004-2011, and 2012-2019.

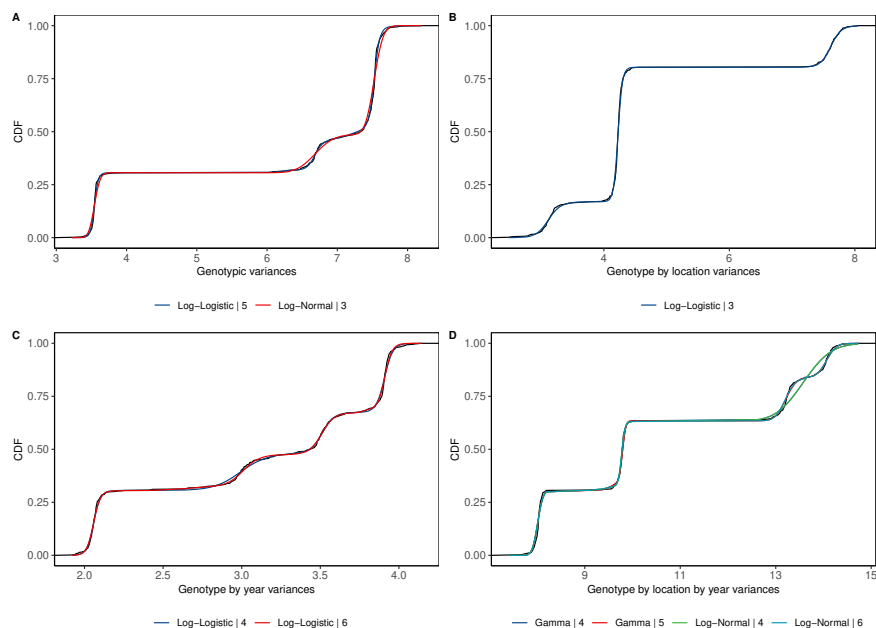

Figure A2: Cumulative distribution function (CDF) for the best-fit models according to the genotypic (A), genotype by location (B), genotype by year (C), and genotype by location by year (D) variances from jackknife. In each plot, the legends states for name of the distribution followed by its mixture number.

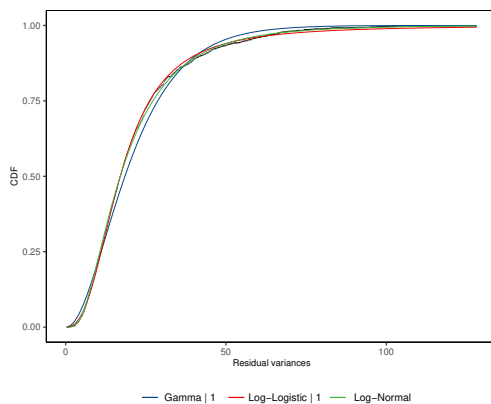

Figure A3: Cumulative distribution function (CDF) for the best-fit models according to the residual variances from individual trial level. The legends states for the name of the distribution followed by its mixture number.

Table A3: Number of genotypes (NG) and locations (NL) within each year, the number of common genotypes between years (upper diagonal), and the number of common locations between years (lower diagonal).

| Years | 89 | 90 | 91 | 92 | 93 | 94 | 95 | 96 | 97 | 98 | 99 | 00 | 01 | 02 | 03 | 04 | 05 | 06 | 07 | 08 | 09 | 10 | 11 | 12 | 13 | 14 | 15 | 16 | 17 | 18 | 19 | NG |     |     |
|-------|----|----|----|----|----|----|----|----|----|----|----|----|----|----|----|----|----|----|----|----|----|----|----|----|----|----|----|----|----|----|----|----|-----|-----|
| 89    | 7  |    |    |    |    |    |    |    |    |    |    |    |    |    |    |    |    |    |    |    |    |    |    |    |    |    |    |    |    |    |    |    | 192 |     |
| 90    | 12 | 28 |    |    |    |    |    |    |    |    |    |    |    |    |    |    |    |    |    |    |    |    |    |    |    |    |    |    |    |    |    |    |     | 144 |
| 91    | 22 | 13 | 45 |    |    |    |    |    |    |    |    |    |    |    |    |    |    |    |    |    |    |    |    |    |    |    |    |    |    |    |    |    |     | 180 |
| 92    | 20 | 12 | 21 | 48 |    |    |    |    |    |    |    |    |    |    |    |    |    |    |    |    |    |    |    |    |    |    |    |    |    |    |    |    |     | 194 |
| 93    | 16 | 11 | 21 | 24 | 40 |    |    |    |    |    |    |    |    |    |    |    |    |    |    |    |    |    |    |    |    |    |    |    |    |    |    |    |     | 179 |
| 94    | 14 | 11 | 18 | 20 | 25 | 45 |    |    |    |    |    |    |    |    |    |    |    |    |    |    |    |    |    |    |    |    |    |    |    |    |    |    |     | 178 |
| 95    | 15 | 10 | 18 | 21 | 24 | 21 | 42 |    |    |    |    |    |    |    |    |    |    |    |    |    |    |    |    |    |    |    |    |    |    |    |    |    |     | 193 |
| 96    | 14 | 9  | 16 | 20 | 21 | 18 | 21 | 32 |    |    |    |    |    |    |    |    |    |    |    |    |    |    |    |    |    |    |    |    |    |    |    |    |     | 187 |
| 97    | 16 | 10 | 19 | 21 | 24 | 21 | 21 | 22 | 45 |    |    |    |    |    |    |    |    |    |    |    |    |    |    |    |    |    |    |    |    |    |    |    |     | 184 |
| 98    | 17 | 12 | 19 | 22 | 23 | 20 | 20 | 25 | 43 | 14 |    |    |    |    |    |    |    |    |    |    |    |    |    |    |    |    |    |    |    |    |    |    |     | 181 |
| 99    | 15 | 10 | 17 | 17 | 19 | 18 | 18 | 17 | 21 | 25 | 37 |    |    |    |    |    |    |    |    |    |    |    |    |    |    |    |    |    |    |    |    |    |     | 183 |
| 00    | 11 | 7  | 13 | 15 | 15 | 14 | 12 | 14 | 16 | 17 | 21 | 32 |    |    |    |    |    |    |    |    |    |    |    |    |    |    |    |    |    |    |    |    |     | 173 |
| 01    | 7  | 6  | 9  | 10 | 11 | 11 | 9  | 10 | 12 | 14 | 17 | 18 | 44 |    |    |    |    |    |    |    |    |    |    |    |    |    |    |    |    |    |    |    |     | 151 |
| 02    | 11 | 7  | 13 | 15 | 15 | 13 | 13 | 14 | 16 | 17 | 19 | 20 | 18 | 24 |    |    |    |    |    |    |    |    |    |    |    |    |    |    |    |    |    |    |     | 180 |
| 03    | 5  | 3  | 7  | 8  | 8  | 6  | 7  | 7  | 8  | 8  | 11 | 12 | 11 | 11 | 19 |    |    |    |    |    |    |    |    |    |    |    |    |    |    |    |    |    |     | 126 |
| 04    | 6  | 3  | 7  | 8  | 9  | 8  | 8  | 9  | 10 | 9  | 11 | 12 | 12 | 14 | 9  | 46 |    |    |    |    |    |    |    |    |    |    |    |    |    |    |    |    |     | 171 |
| 05    | 4  | 1  | 4  | 6  | 5  | 5  | 5  | 5  | 6  | 6  | 8  | 9  | 7  | 10 | 5  | 9  | 42 |    |    |    |    |    |    |    |    |    |    |    |    |    |    |    |     | 164 |
| 06    | 6  | 2  | 6  | 7  | 7  | 6  | 6  | 7  | 8  | 8  | 9  | 9  | 8  | 11 | 6  | 11 | 8  | 50 |    |    |    |    |    |    |    |    |    |    |    |    |    |    |     | 185 |
| 07    | 4  | 2  | 4  | 5  | 6  | 4  | 4  | 5  | 6  | 6  | 7  | 7  | 7  | 9  | 6  | 10 | 7  | 9  | 49 |    |    |    |    |    |    |    |    |    |    |    |    |    |     | 229 |
| 08    | 6  | 2  | 6  | 8  | 7  | 5  | 6  | 7  | 7  | 7  | 8  | 9  | 7  | 11 | 6  | 9  | 8  | 9  | 8  | 41 |    |    |    |    |    |    |    |    |    |    |    |    |     | 217 |
| 09    | 8  | 4  | 8  | 10 | 9  | 7  | 8  | 9  | 9  | 11 | 11 | 11 | 8  | 12 | 6  | 10 | 8  | 10 | 8  | 11 | 36 |    |    |    |    |    |    |    |    |    |    |    |     | 231 |
| 10    | 5  | 3  | 5  | 6  | 5  | 4  | 5  | 5  | 5  | 5  | 8  | 8  | 4  | 8  | 4  | 6  | 7  | 6  | 6  | 8  | 11 | 21 |    |    |    |    |    |    |    |    |    |    | 137 |     |
| 11    | 4  | 3  | 4  | 6  | 5  | 5  | 4  | 5  | 5  | 5  | 7  | 8  | 5  | 8  | 2  | 6  | 6  | 7  | 5  | 7  | 11 | 9  | 27 |    |    |    |    |    |    |    |    |    | 139 |     |
| 12    | 4  | 2  | 4  | 6  | 5  | 4  | 4  | 5  | 5  | 6  | 8  | 8  | 6  | 8  | 3  | 7  | 6  | 8  | 6  | 7  | 10 | 7  | 11 | 43 |    |    |    |    |    |    |    |    | 179 |     |
| 13    | 7  | 3  | 6  | 8  | 7  | 5  | 6  | 7  | 7  | 7  | 7  | 7  | 4  | 8  | 3  | 7  | 6  | 8  | 6  | 7  | 11 | 9  | 11 | 13 | 34 |    |    |    |    |    |    |    | 161 |     |
| 14    | 6  | 3  | 6  | 6  | 5  | 4  | 5  | 5  | 5  | 6  | 7  | 7  | 3  | 7  | 3  | 5  | 5  | 5  | 4  | 5  | 8  | 7  | 6  | 8  | 9  | 41 |    |    |    |    |    |    | 140 |     |
| 15    | 4  | 3  | 4  | 5  | 4  | 4  | 4  | 4  | 4  | 4  | 5  | 6  | 2  | 5  | 2  | 4  | 4  | 4  | 3  | 4  | 7  | 7  | 6  | 8  | 9  | 9  | 48 |    |    |    |    |    | 154 |     |
| 16    | 5  | 3  | 5  | 6  | 4  | 4  | 4  | 4  | 4  | 5  | 6  | 6  | 3  | 6  | 2  | 4  | 4  | 5  | 2  | 4  | 6  | 4  | 5  | 7  | 7  | 9  | 7  | 56 |    |    |    |    | 169 |     |
| 17    | 9  | 6  | 8  | 11 | 8  | 7  | 8  | 8  | 8  | 11 | 12 | 10 | 8  | 11 | 6  | 5  | 4  | 5  | 3  | 6  | 9  | 7  | 6  | 8  | 8  | 8  | 8  | 60 |    |    |    |    | 175 |     |
| 18    | 6  | 4  | 6  | 7  | 7  | 5  | 6  | 6  | 6  | 6  | 8  | 8  | 6  | 8  | 7  | 5  | 3  | 3  | 3  | 5  | 7  | 6  | 4  | 5  | 7  | 5  | 7  | 14 |    |    |    |    | 183 |     |
| 19    | 5  | 3  | 3  | 6  | 3  | 3  | 3  | 3  | 3  | 4  | 4  | 5  | 3  | 5  | 2  | 2  | 4  | 2  | 2  | 3  | 4  | 5  | 3  | 4  | 6  | 5  | 7  | 4  | 11 |    |    |    | 233 |     |
| NL    | 24 | 15 | 27 | 30 | 32 | 27 | 26 | 23 | 27 | 31 | 30 | 25 | 21 | 23 | 14 | 15 | 12 | 12 | 10 | 11 | 15 | 12 | 13 | 16 | 17 | 12 | 11 | 11 | 20 | 16 | 13 |    |     |     |

Table A4: Goodness-of-fit (GOF) statistics and selection criteria for the fit of univariate and multivariate probability distributions for genotypic, genotype by location, genotype by year, and genotype by location by year variance components estimated from the jackknife analysis, and residuals variances from trial-level. The best-fit model is highlighted in bold. KS, CM, AD, AIC, and BIC stand for Kolmogorov-Smirnov, Cramer-von Mises, Anderson-Darling, Akaike's and Bayesian Information Criterion, respectively.

| Variance             | Distribution        | Mixture of | GOF statistics |             |             | GOF criteria  |               |                |
|----------------------|---------------------|------------|----------------|-------------|-------------|---------------|---------------|----------------|
|                      |                     |            | KS             | CM          | AD          | AIC           | BIC           | Log-likelihood |
| Genotypic            | Gamma               | 2          | 0.19           | 4.39        | 25.23       | 672.09        | 694.00        | -331.05        |
|                      | Log-Logistic        | 2          | 0.15           | 3.32        | 19.97       | 598.57        | 620.48        | -294.29        |
|                      | Log-Normal          | 2          | 0.19           | 4.48        | 25.66       | 680.36        | 702.27        | -335.18        |
|                      | Burr                | 2          | 0.50           | 40.79       | 193.24      | 3978.69       | 4000.60       | -1984.35       |
|                      | F                   | 2          | 0.67           | 77.08       | 356.80      | 4338.62       | 4360.52       | -2164.31       |
|                      | Gamma               | 3          | 0.07           | 0.81        | 5.56        | 182.11        | 217.16        | -83.06         |
|                      | Log-Logistic        | 3          | 0.15           | 3.26        | 19.45       | 554.84        | 589.90        | -269.42        |
|                      | Log-Normal          | 3          | 0.08           | 0.66        | 4.90        | 170.74        | 205.79        | -77.37         |
|                      | Burr                | 3          | 0.52           | 44.39       | 207.91      | 3978.03       | 4013.09       | -1981.02       |
|                      | F                   | 3          | 0.67           | 77.08       | 356.80      | 4338.62       | 4360.52       | -2164.31       |
|                      | Gamma               | 4          | 0.09           | 1.03        | 6.20        | 177.38        | 225.58        | -77.69         |
|                      | Log-Logistic        | 4          | 0.15           | 3.26        | 19.45       | 565.62        | 613.82        | -271.81        |
|                      | Log-Normal          | 4          | 0.08           | 0.52        | 3.61        | 74.67         | 122.87        | -26.33         |
|                      | Burr                | 4          | 0.52           | 44.39       | 207.91      | 3984.04       | 4032.24       | -1981.02       |
|                      | F                   | 4          | 0.67           | 75.30       | 347.50      | 4351.57       | 4399.77       | -2164.79       |
|                      | Gamma               | 5          | 0.10           | 0.74        | 5.85        | 155.12        | 216.47        | -63.56         |
|                      | <b>Log-Logistic</b> | <b>5</b>   | <b>0.05</b>    | <b>0.21</b> | <b>1.67</b> | <b>-9.63</b>  | <b>51.71</b>  | <b>18.82</b>   |
|                      | Log-Normal          | 5          | 0.06           | 0.36        | 2.53        | 89.40         | 150.75        | -30.70         |
|                      | Burr                | 5          | 0.53           | 45.19       | 211.25      | 3989.54       | 4050.89       | -1980.77       |
|                      | F                   | 5          | 0.67           | 75.93       | 350.80      | 4357.11       | 4418.45       | -2164.55       |
| Gamma                | 6                   | 0.07       | 0.46           | 3.15        | 94.30       | 168.79        | -30.15        |                |
| Log-Logistic         | 6                   | 0.05       | 0.20           | 1.89        | 32.97       | 107.47        | 0.51          |                |
| Log-Normal           | 6                   | 0.06       | 0.37           | 2.68        | 103.17      | 177.66        | -34.59        |                |
| Burr                 | 6                   | 0.52       | 43.68          | 205.00      | 3996.91     | 4071.40       | -1981.45      |                |
| F                    | 6                   | 0.66       | 74.44          | 343.11      | 4364.38     | 4438.87       | -2165.19      |                |
| Genotype by Location | Gamma               | 2          | 0.30           | 10.51       | 48.78       | 1164.59       | 1186.50       | -577.29        |
|                      | Log-Logistic        | 2          | 0.24           | 8.35        | 49.77       | 1139.99       | 1161.90       | -565.00        |
|                      | Log-Normal          | 2          | 0.30           | 10.80       | 50.82       | 1194.97       | 1216.87       | -592.48        |
|                      | Burr                | 2          | 0.50           | 42.63       | 197.90      | 3466.48       | 3488.39       | -1728.24       |
|                      | F                   | 2          | 0.63           | 67.82       | 305.85      | 3830.34       | 3852.24       | -1910.17       |
|                      | Gamma               | 3          | 0.30           | 10.52       | 48.87       | 1185.88       | 1220.94       | -584.94        |
|                      | <b>Log-Logistic</b> | <b>3</b>   | <b>0.04</b>    | <b>0.14</b> | <b>0.72</b> | <b>-80.42</b> | <b>-45.36</b> | <b>48.21</b>   |
|                      | Log-Normal          | 3          | 0.06           | 0.49        | 2.38        | -5.10         | 29.96         | 10.55          |
|                      | Burr                | 3          | 0.50           | 42.78       | 198.50      | 3477.58       | 3512.63       | -1730.79       |
|                      | F                   | 3          | 0.63           | 67.82       | 305.85      | 3830.34       | 3852.24       | -1910.17       |
|                      | Gamma               | 4          | 0.30           | 10.51       | 48.83       | 1185.69       | 1233.89       | -581.85        |
|                      | Log-Logistic        | 4          | 0.04           | 0.13        | 0.62        | -80.72        | -32.52        | 51.36          |
|                      | Log-Normal          | 4          | 0.06           | 0.48        | 2.20        | -10.68        | 37.52         | 16.34          |
|                      | Burr                | 4          | 0.50           | 41.96       | 195.32      | 3482.35       | 3530.55       | -1730.18       |
|                      | F                   | 4          | 0.65           | 73.19       | 331.38      | 3854.78       | 3902.98       | -1916.39       |
|                      | Gamma               | 5          | 0.02           | 0.07        | 0.56        | -34.66        | 26.69         | 31.33          |
|                      | Log-Logistic        | 5          | 0.03           | 0.10        | 0.59        | -73.99        | -12.64        | 50.99          |
|                      | Log-Normal          | 5          | 0.02           | 0.06        | 0.49        | -66.28        | -4.93         | 47.14          |

**Table A4 continued from previous page**

| Variance               | Distribution        | Mixture of | GOF statistics |        |         | GOF criteria |          |                |
|------------------------|---------------------|------------|----------------|--------|---------|--------------|----------|----------------|
|                        |                     |            | KS             | CM     | AD      | AIC          | BIC      | Log-likelihood |
| Genotype<br>by<br>Year | Burr                | 5          | 0.49           | 41.22  | 192.48  | 3488.02      | 3549.36  | -1730.01       |
|                        | F                   | 5          | 0.65           | 72.56  | 328.33  | 3860.42      | 3921.76  | -1916.21       |
|                        | Gamma               | 6          | 0.02           | 0.06   | 0.40    | -30.91       | 43.58    | 32.46          |
|                        | Log-Logistic        | 6          | 0.03           | 0.09   | 0.46    | -74.96       | -0.47    | 54.48          |
|                        | Log-Normal          | 6          | 0.03           | 0.04   | 0.25    | -71.57       | 2.92     | 52.78          |
|                        | Burr                | 6          | 0.49           | 41.61  | 194.00  | 3494.23      | 3568.72  | -1730.11       |
|                        | F                   | 6          | 0.65           | 72.49  | 328.02  | 3866.55      | 3941.05  | -1916.28       |
|                        | Gamma               | 2          | 0.13           | 2.33   | 17.77   | 805.22       | 827.13   | -397.61        |
|                        | Log-Logistic        | 2          | 0.12           | 1.39   | 10.73   | 522.98       | 544.89   | -256.49        |
|                        | Log-Normal          | 2          | 0.13           | 1.80   | 12.89   | 546.28       | 568.19   | -268.14        |
|                        | Burr                | 2          | 0.46           | 34.26  | 165.40  | 2641.18      | 2663.09  | -1315.59       |
|                        | F                   | 2          | 0.67           | 80.39  | 375.82  | 3042.72      | 3064.63  | -1516.36       |
|                        | Gamma               | 3          | 0.12           | 1.48   | 10.61   | 438.20       | 473.26   | -211.10        |
|                        | Log-Logistic        | 3          | 0.08           | 0.29   | 1.48    | 69.69        | 104.75   | -26.85         |
|                        | Log-Normal          | 3          | 0.13           | 1.36   | 10.01   | 402.06       | 437.11   | -193.03        |
|                        | Burr                | 3          | 0.49           | 38.99  | 184.26  | 2636.35      | 2671.40  | -1310.17       |
|                        | F                   | 3          | 0.67           | 80.39  | 375.82  | 3042.72      | 3064.63  | -1516.36       |
|                        | Gamma               | 4          | 0.12           | 1.34   | 9.44    | 391.85       | 440.05   | -184.92        |
|                        | Log-Logistic        | 4          | 0.04           | 0.11   | 1.14    | -21.98       | 26.22    | 21.99          |
|                        | Log-Normal          | 4          | 0.05           | 0.26   | 2.48    | 69.53        | 117.73   | -23.77         |
|                        | Burr                | 4          | 0.48           | 36.59  | 174.58  | 2642.16      | 2690.36  | -1310.08       |
|                        | F                   | 4          | 0.65           | 73.44  | 338.37  | 3062.06      | 3110.26  | -1520.03       |
|                        | Gamma               | 5          | 0.07           | 0.45   | 4.18    | 142.71       | 204.05   | -57.35         |
|                        | Log-Logistic        | 5          | 0.03           | 0.09   | 1.07    | -25.40       | 35.94    | 26.70          |
|                        | Log-Normal          | 5          | 0.05           | 0.27   | 2.52    | 73.76        | 135.10   | -22.88         |
|                        | Burr                | 5          | 0.46           | 33.87  | 163.84  | 2652.24      | 2713.58  | -1312.12       |
|                        | F                   | 5          | 0.65           | 73.45  | 338.42  | 3068.16      | 3129.51  | -1520.08       |
|                        | Gamma               | 6          | 0.05           | 0.29   | 2.90    | 78.16        | 152.65   | -22.08         |
|                        | <b>Log-Logistic</b> | <b>6</b>   | 0.03           | 0.08   | 1.04    | -35.86       | 38.63    | 34.93          |
|                        | Log-Normal          | 6          | 0.04           | 0.13   | 1.11    | 2.00         | 76.49    | 16.00          |
| Burr                   | 6                   | 0.45       | 32.15          | 157.07 | 2645.95 | 2720.44      | -1305.98 |                |
| F                      | 6                   | 0.65       | 73.41          | 338.24 | 3073.76 | 3148.25      | -1519.88 |                |
| Gamma                  | 2                   | 0.18       | 3.72           | 23.32  | 2027.94 | 2049.84      | -1008.97 |                |
| Log-Logistic           | 2                   | 0.17       | 3.40           | 21.40  | 2104.98 | 2126.88      | -1047.49 |                |
| Log-Normal             | 2                   | 0.18       | 3.73           | 23.33  | 2028.46 | 2050.36      | -1009.23 |                |
| Burr                   | 2                   | 0.57       | 46.63          | 216.45 | 4962.90 | 4984.81      | -2476.45 |                |
| F                      | 2                   | 0.68       | 68.15          | 308.55 | 5298.60 | 5320.51      | -2644.30 |                |
| Gamma                  | 3                   | 0.06       | 0.52           | 3.94   | 905.88  | 940.93       | -444.94  |                |
| Log-Logistic           | 3                   | 0.17       | 3.22           | 19.52  | 1938.73 | 1973.78      | -961.36  |                |
| Log-Normal             | 3                   | 0.06       | 0.52           | 3.96   | 909.36  | 944.42       | -446.68  |                |
| Burr                   | 3                   | 0.60       | 51.37          | 235.46 | 4969.12 | 5004.18      | -2476.56 |                |
| F                      | 3                   | 0.68       | 68.15          | 308.57 | 5304.63 | 5339.68      | -2644.31 |                |
| Gamma                  | 4                   | 0.06       | 0.41           | 3.50   | 830.66  | 878.86       | -404.33  |                |
| Log-Normal             | 4                   | 0.06       | 0.36           | 3.30   | 810.14  | 858.34       | -394.07  |                |
| Burr                   | 4                   | 0.60       | 51.37          | 235.46 | 4975.11 | 5023.31      | -2476.55 |                |
| F                      | 4                   | 0.69       | 71.27          | 323.14 | 5313.82 | 5362.02      | -2645.91 |                |
| <b>Gamma</b>           | <b>5</b>            | 0.05       | 0.21           | 1.74   | 709.98  | 771.33       | -340.99  |                |
| Log-Normal             | 5                   | 0.06       | 0.22           | 1.15   | 715.12  | 776.47       | -343.56  |                |
| Burr                   | 5                   | 0.60       | 51.37          | 235.46 | 4981.10 | 5042.45      | -2476.55 |                |



**Table A4 continued from previous page**

| Variance                  | Distribution        | Mixture of | GOF statistics |        |        | GOF criteria |          |                |
|---------------------------|---------------------|------------|----------------|--------|--------|--------------|----------|----------------|
|                           |                     |            | KS             | CM     | AD     | AIC          | BIC      | Log-likelihood |
| Residual<br>(Trial-level) | F                   | 5          | 0.70           | 75.75  | 344.66 | 5317.16      | 5378.51  | -2644.58       |
|                           | Gamma               | 6          | 0.06           | 0.32   | 2.58   | 781.22       | 855.71   | -373.61        |
|                           | Log-Normal          | 6          | 0.05           | 0.16   | 1.53   | 691.83       | 766.32   | -328.91        |
|                           | Burr                | 6          | 0.58           | 48.52  | 223.96 | 4989.49      | 5063.98  | -2477.75       |
|                           | F                   | 6          | 0.68           | 68.92  | 312.13 | 5322.81      | 5397.30  | -2644.40       |
|                           | Gamma               | 1          | 0.06           | 1.60   | 9.57   | 11139.50     | 11150.02 | -5567.80       |
|                           | <b>Log-Logistic</b> | <b>1</b>   | 0.02           | 0.07   | 0.72   | 11063.82     | 11074.34 | -5529.90       |
|                           | Log-Normal          | 1          | 0.02           | 0.09   | 0.67   | 11066.60     | 11077.12 | -5531.10       |
|                           | Burr                | 1          | 0.41           | 79.00  | 377.80 | 13896.60     | 13907.11 | -6946.30       |
|                           | F                   | 1          | 0.54           | 131.37 | 594.40 | 14677.45     | 14687.97 | -7336.73       |

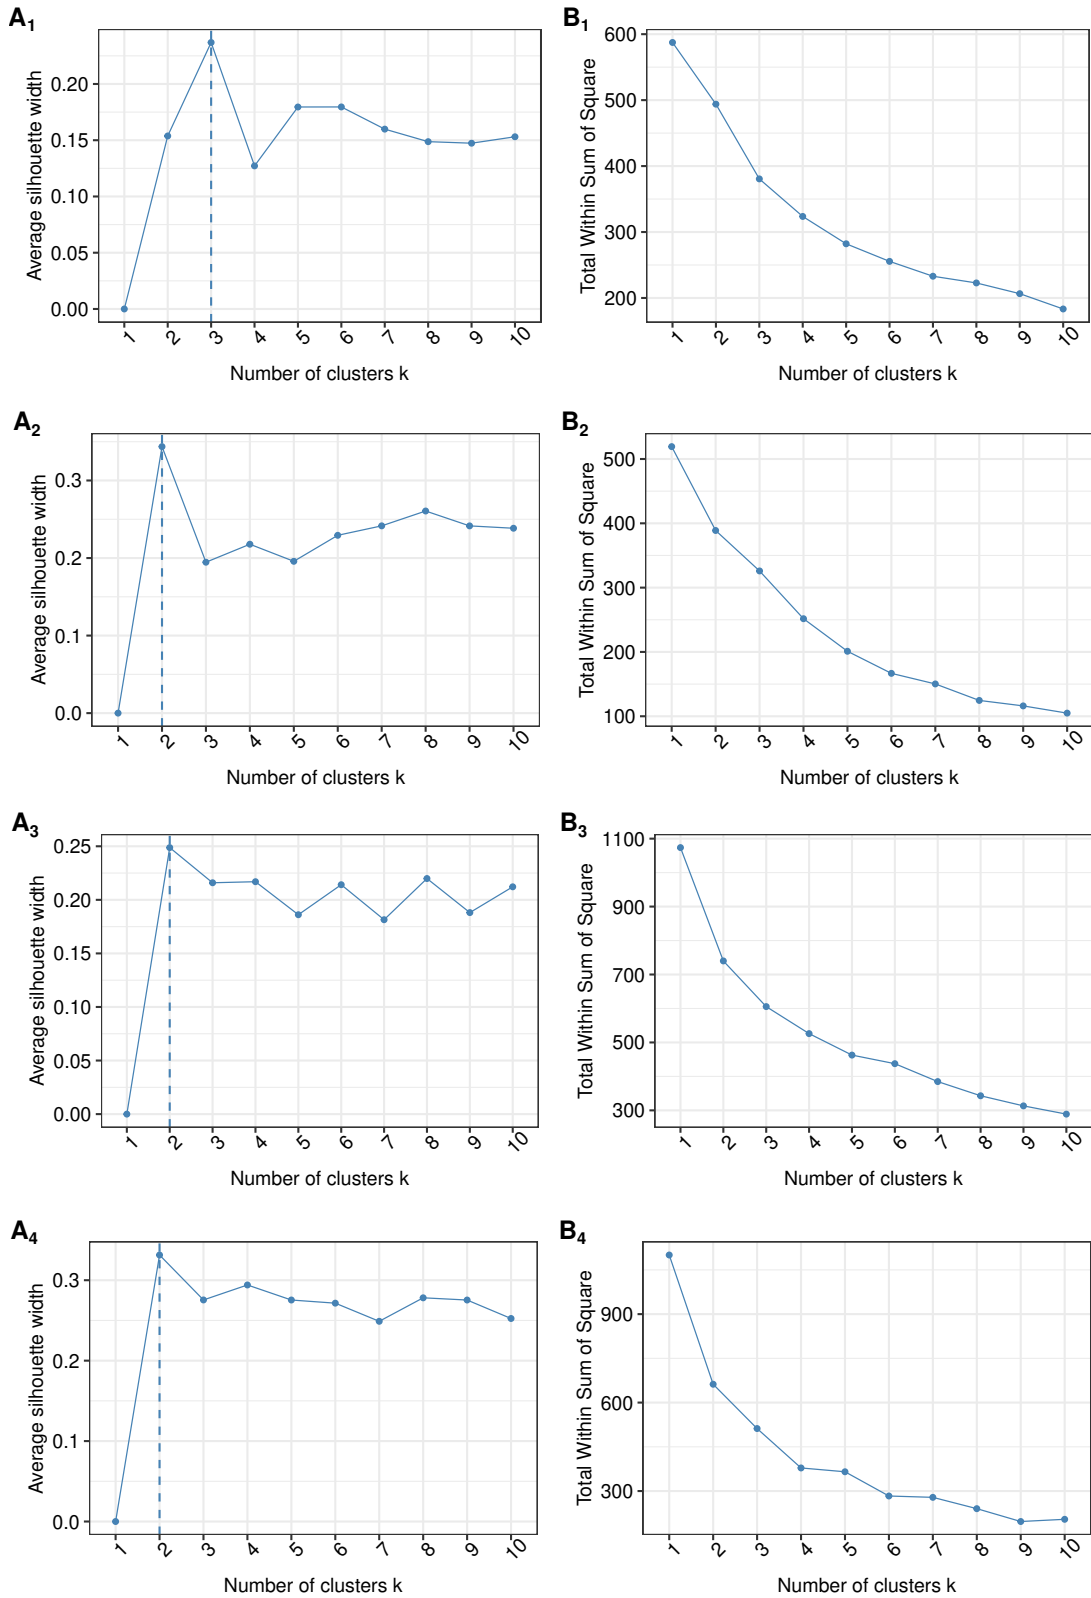

Figure A4: Graphical display of the optimal number of clusters based on the Silhouette (A) and Elbow (B) methods for the phenotypic clustering type (PHE, A<sub>1</sub> and B<sub>1</sub>), soil + elevation variables (SoilE, A<sub>2</sub> and B<sub>2</sub>), weather within year variables (WW, A<sub>3</sub> and B<sub>3</sub>), and weather across year variables (WA, A<sub>4</sub> and B<sub>4</sub>).

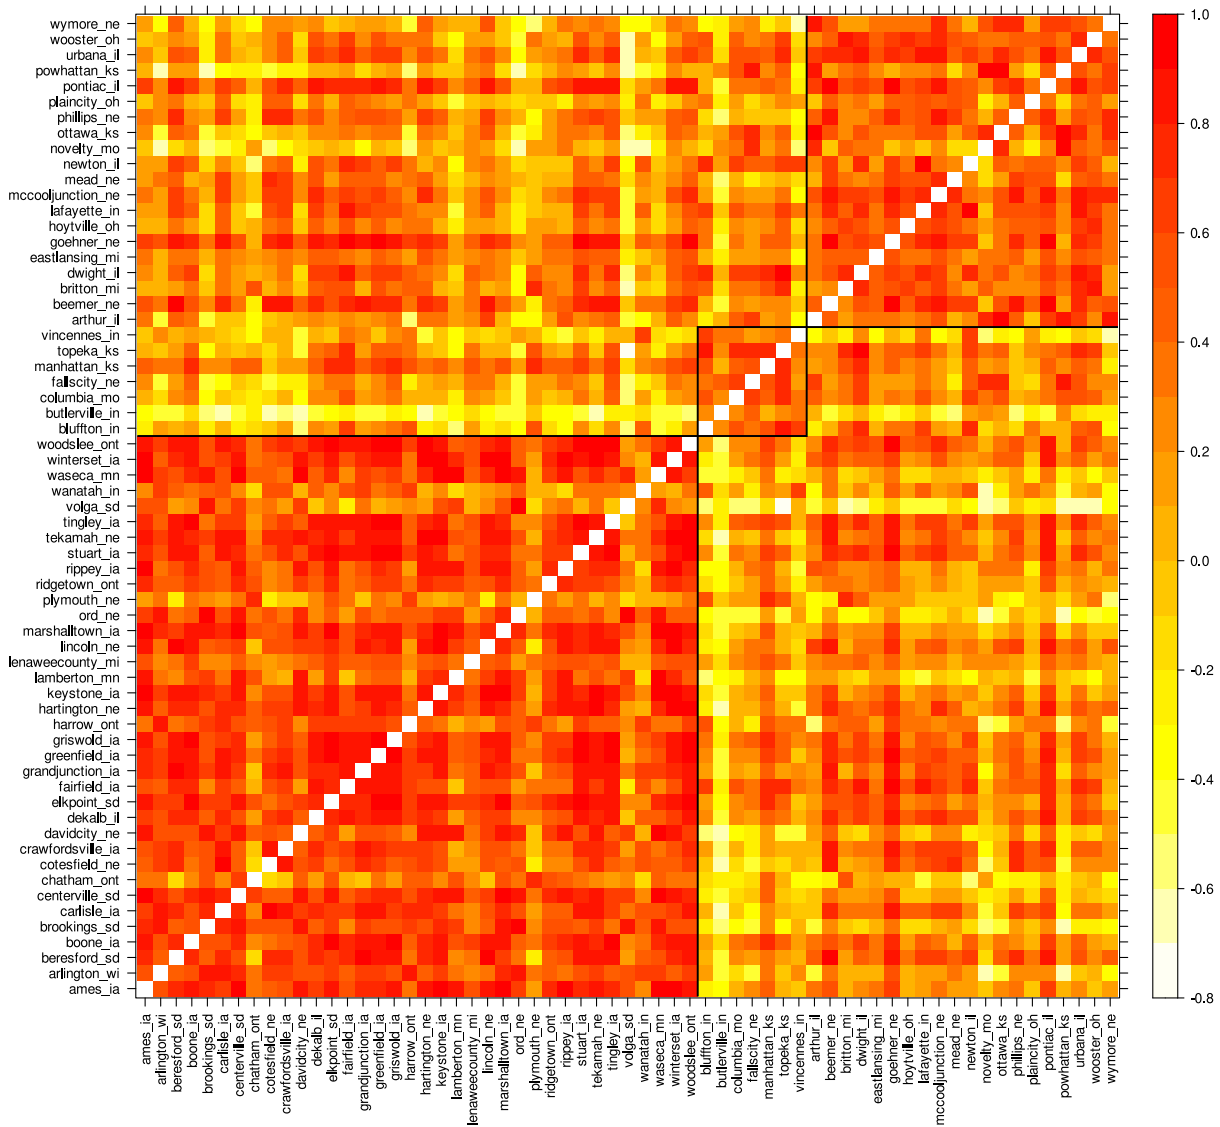

Figure A5: Heatmap of genetic correlations between the 63 observed locations from 1989 to 2019, estimated from the factor analytic (FA) model M3-18. Fitted k-means clustering are ordered, from 1 to 3.

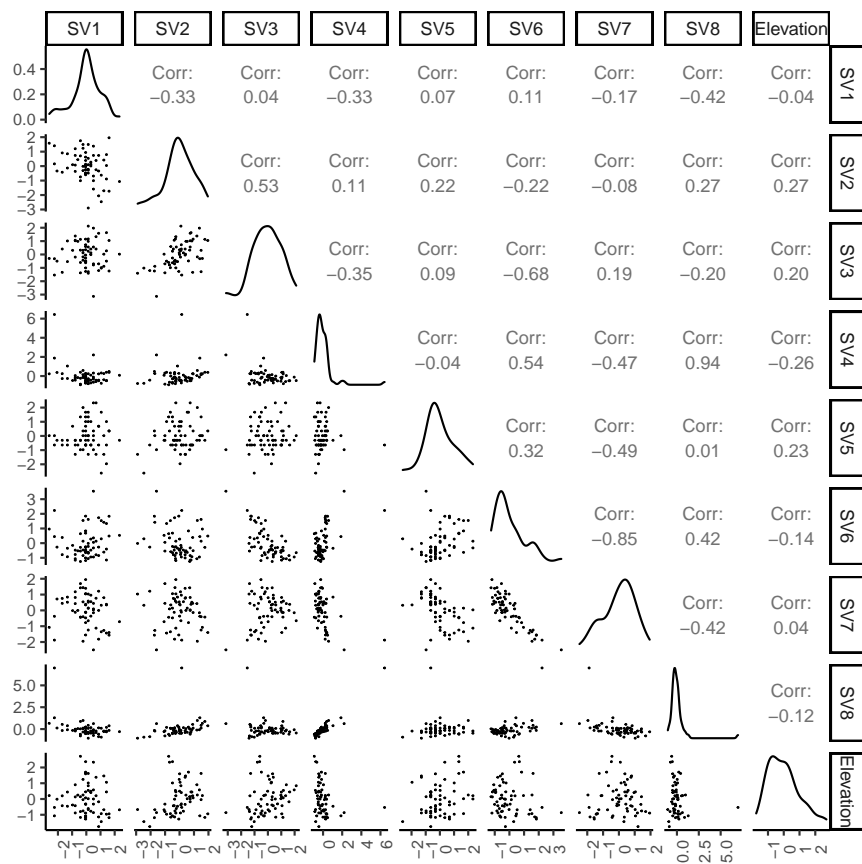

Figure A6: Scatterplots of the scaled and centered soil variables and elevation. Pearson correlation is displayed on the right. Variable distribution is available on the diagonal. The labels SV1, SV2, to SV8 are the soil variables described in section 5.3.5.

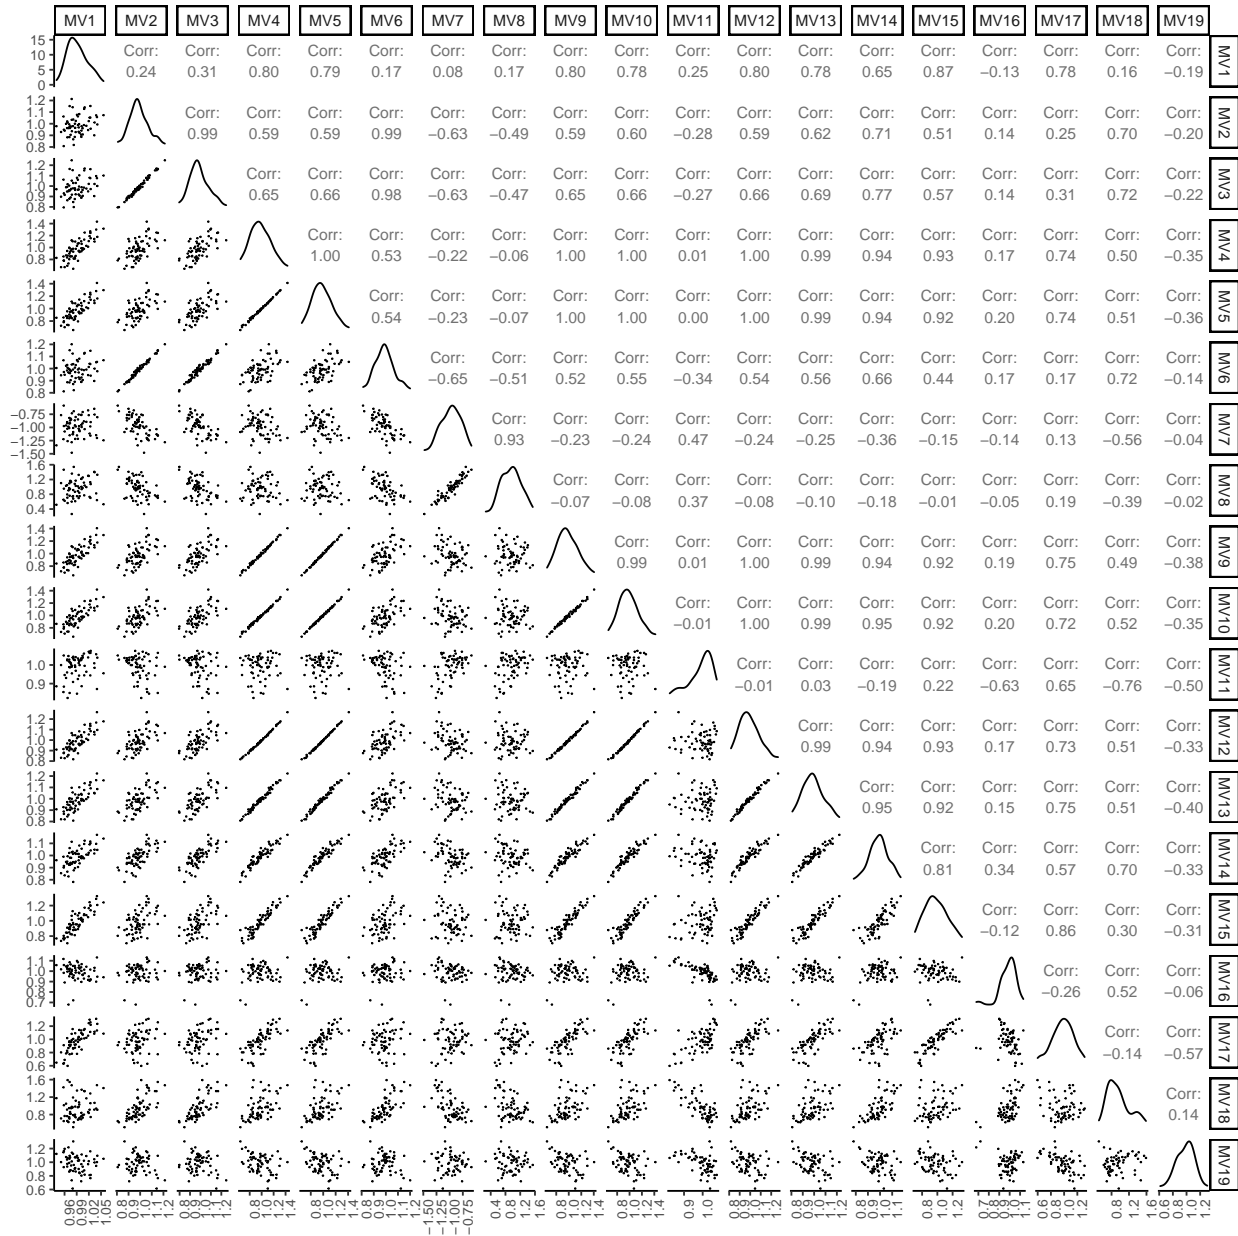

Figure A7: Scatterplots of the scaled and centered weather variables computed across years. Pearson correlation is displayed on the right. Variable distribution is available on the diagonal. The labels MV1, MV2, ..., to MV19, are the weather variables described in Table A1.

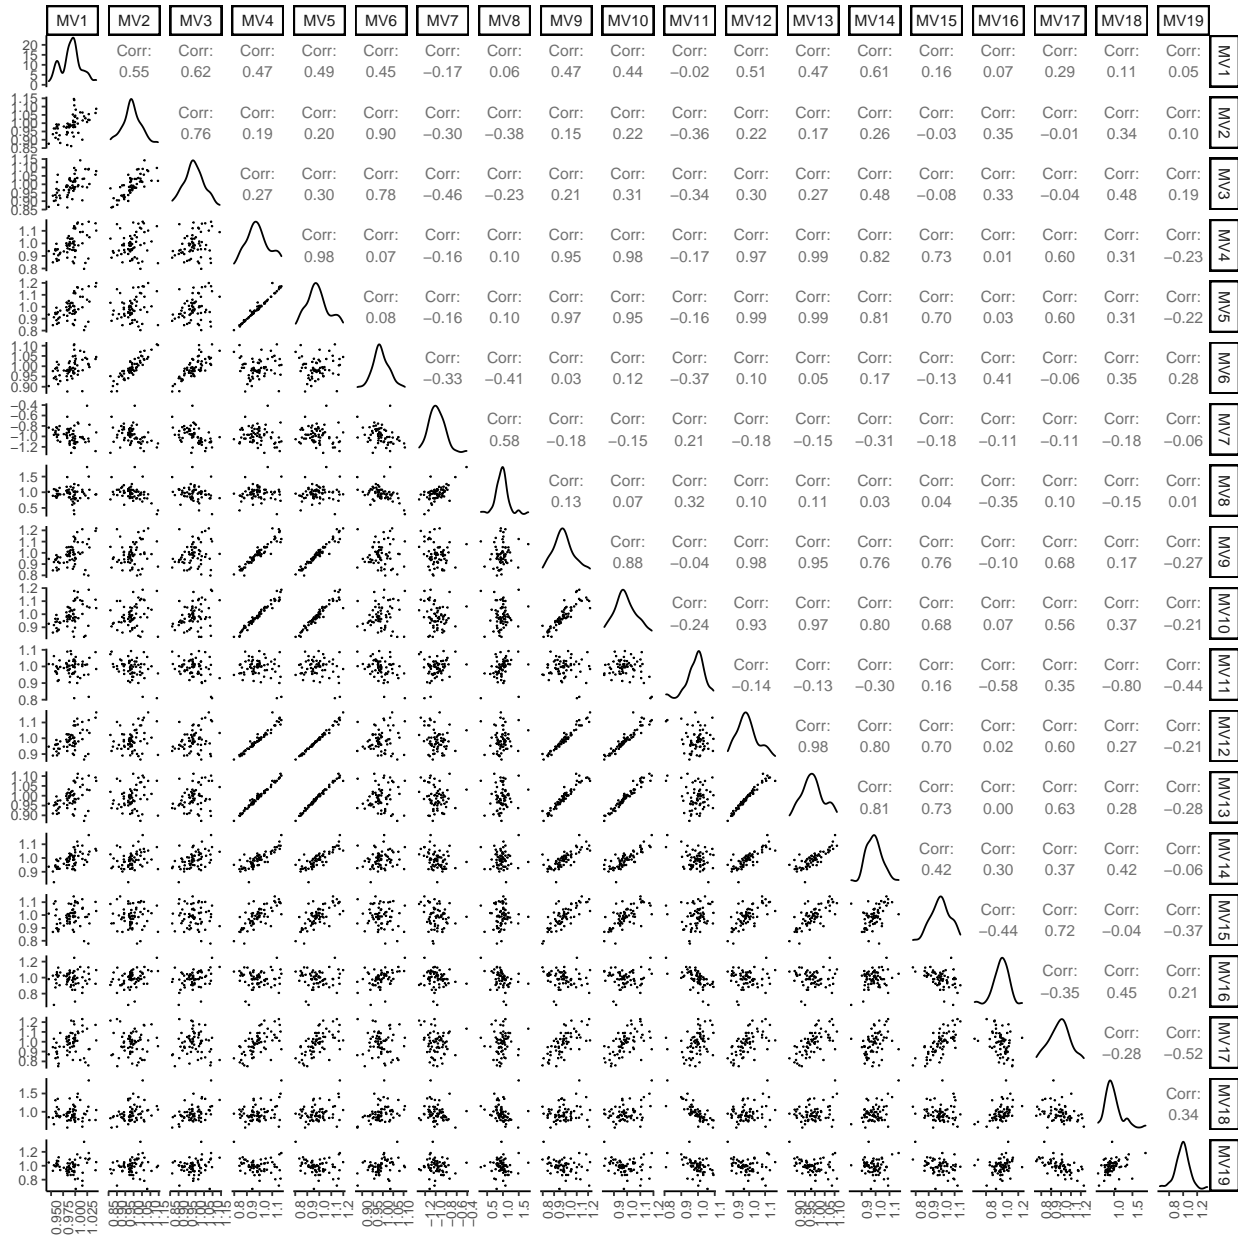

Figure A8: Scatterplots of the scaled and centered weather variables computed within years. Pearson correlation is displayed on the right. Variable distribution is available on the diagonal. The labels MV1, MV2, ..., to MV19, are the weather variables described in Table A2.



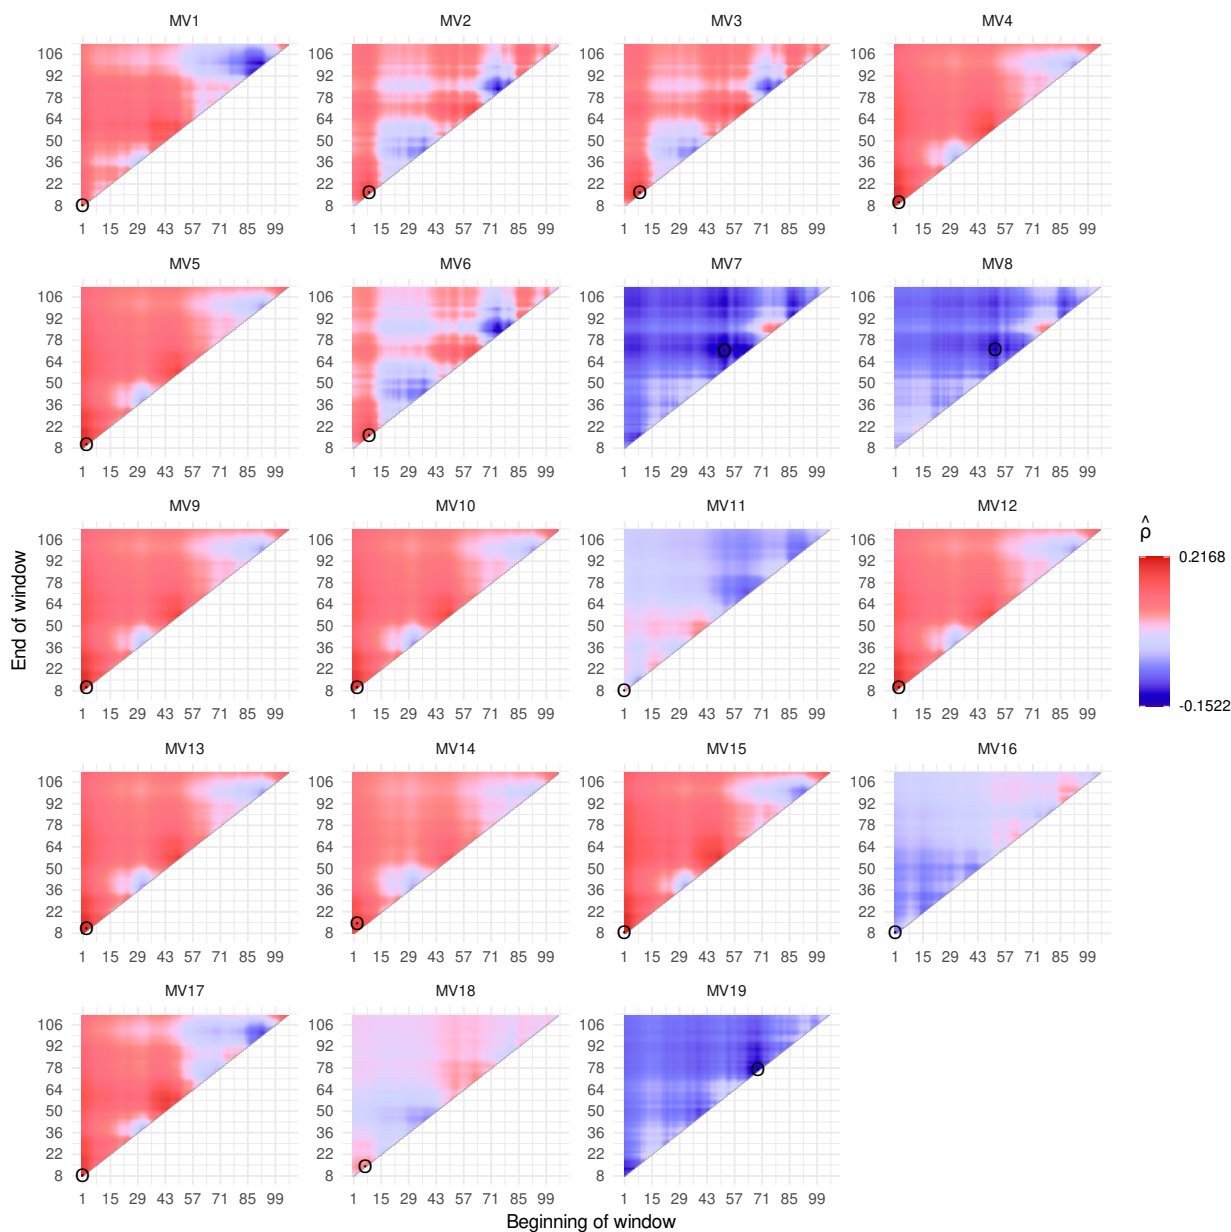

Figure A9: Exhaustive search from the critical environmental window computed from the Pearson correlation between the weather variables across years and the genotype by location deviations of each environment (location-year combination). The dots depict the highest window correlation. The labels MV1, MV2, to MV19 are the weather variables described in Table A1.

Table A5: Jaccard similarity matrix between clustering-types (phenotypic - PHE, soil and elevation - SoilE, latitude split into 2 clusters - Lat2, latitude split into 3 clusters - Lat3, weather across years - WA, and weather within years - WW).

| Clusters | PHE |   |   | SoilE |      | Lat2 |      |      | Lat3 |      |      | WA   |      | WW   |  |
|----------|-----|---|---|-------|------|------|------|------|------|------|------|------|------|------|--|
|          | 1   | 2 | 3 | 1     | 2    | 1    | 2    | 1    | 2    | 3    | 1    | 2    | 1    | 2    |  |
| PHE      | 1   | 1 | - | 0.25  | 0.44 | 0.18 | 0.64 | 0.02 | 0.53 | 0.27 | 0.20 | 0.54 | 0.12 | 0.60 |  |
|          | 2   | 1 | - | 0.00  | 0.14 | 0.20 | 0.00 | 0.35 | 0.02 | 0.00 | 0.23 | 0.02 | 0.18 | 0.06 |  |
|          | 3   | 1 | 1 | 0.13  | 0.30 | 0.45 | 0.07 | 0.33 | 0.22 | 0.03 | 0.25 | 0.23 | 0.30 | 0.21 |  |
| SoilE    | 1   | 1 | - | 1     | -    | 0.07 | 0.35 | 0.03 | 0.16 | 0.32 | 0.00 | 0.37 | 0.00 | 0.32 |  |
|          | 2   | 1 | 1 | 1     | 1    | 0.62 | 0.28 | 0.30 | 0.52 | 0.09 | 0.51 | 0.38 | 0.39 | 0.48 |  |
| Lat2     | 1   | 1 | - | 1     | -    | 1    | -    | 0.46 | 0.37 | 0.00 | 0.58 | 0.22 | 0.42 | 0.32 |  |
|          | 2   | 1 | 1 | 1     | 1    | 0.00 | 0.36 | 0.39 | 0.06 | 0.61 | 0.06 | 0.61 | 0.07 | 0.53 |  |
| Lat3     | 1   | 1 | - | 1     | -    | 1    | -    | 1    | -    | -    | 0.41 | 0.08 | 0.35 | 0.13 |  |
|          | 2   | 1 | - | 1     | -    | 1    | -    | 1    | -    | -    | 0.22 | 0.51 | 0.20 | 0.51 |  |
|          | 3   | 1 | 1 | 1     | 1    | 1    | 1    | 1    | 1    | 1    | 0.06 | 0.23 | 0.03 | 0.22 |  |
| WA       | 1   | 1 | - | 1     | -    | 1    | -    | 1    | -    | -    | 1    | -    | 0.42 | 0.21 |  |
|          | 2   | 1 | 1 | 1     | 1    | 1    | 1    | 1    | 1    | 1    | 1    | 1    | 0.12 | 0.64 |  |
